# Supplementary material for: Transcriptomes Divergence of Ricotia lunaria Between the Two Micro-Climatic Divergent Slopes at “Evolution Canyon” I, Israel
Source: Front Genet. 2018 Nov 14;9:506. doi: 10.3389/fgene.2018.00506 (PMC6246625; doi:10.3389/fgene.2018.00506)
Supplement: Supplementary file 2 [file Table_1.xlsx]

## Sheet: Sheet1
Table S1 Genes involved in KEGG pathway
#pathway	pathway_id	Gene_number	Gene_id	KOs
Ribosome	ko03010	462	T1_Unigene_BMK.10040;T1_Unigene_BMK.10100;T1_Unigene_BMK.10101;T1_Unigene_BMK.10134;T1_Unigene_BMK.10304;T1_Unigene_BMK.10350;T1_Unigene_BMK.1047;T1_Unigene_BMK.10477;T1_Unigene_BMK.1058;T1_Unigene_BMK.10731;T1_Unigene_BMK.10939;T1_Unigene_BMK.10994;T1_Unigene_BMK.11206;T1_Unigene_BMK.11228;T1_Unigene_BMK.11229;T1_Unigene_BMK.11296;T1_Unigene_BMK.11397;T1_Unigene_BMK.11458;T1_Unigene_BMK.11610;T1…	K02953+K02877+K02918+K02924+K02989+K02915+K02975+K02985+K02921+K02872+K02942+K02991+K02979+K02941+K02941+K02908+K02929+K02900+K02889+K02875+K02923+K02885+K02942+K02925+K02955+K02883+K02971+K02937+K02977+K02977+K02917+K02971+K02894+K02981+K02981+K02872+K02885+K02885+K02879+K02951+K02937+K02990+K02901+K02977+K02894+K02907+K02896+K02922+K02925+K02868+K02976+K02864+K02879+K02996+K02960+K02865+K02880+…
Plant hormone signal transduction	ko04075	325	T1_Unigene_BMK.10250;T1_Unigene_BMK.10403;T1_Unigene_BMK.10422;T1_Unigene_BMK.10684;T1_Unigene_BMK.11121;T1_Unigene_BMK.11151;T1_Unigene_BMK.11152;T1_Unigene_BMK.11330;T1_Unigene_BMK.11367;T1_Unigene_BMK.12279;T1_Unigene_BMK.12280;T1_Unigene_BMK.12693;T1_Unigene_BMK.12990;T1_Unigene_BMK.13141;T1_Unigene_BMK.13343;T1_Unigene_BMK.1357;T1_Unigene_BMK.13697;T1_Unigene_BMK.14300;T1_Unigene_BMK.14459;T…	K14488+K14488+K14491+K13946+K14488+K14489+K14489+K14496+K14488+K14516+K14516+K14497+K14431+K14514+K14505+K14491+K14491+K14496+K14497+K14497+K14484+K14488+K14491+K14492+K14498+K14498+K14498+K14490+K14488+K14512+K14488+K14488+K14488+K13449+K14484+K14484+K14488+K14484+K14484+K14492+K14495+K14498+K14498+K14488+K14496+K14497+K14488+K14491+K14492+K14487+K14490+K14487+K14488+K14509+K14431+K13464+K14491+…
Oxidative phosphorylation	ko00190	287	T1_Unigene_BMK.10127;T1_Unigene_BMK.1075;T1_Unigene_BMK.10962;T1_Unigene_BMK.11070;T1_Unigene_BMK.11326;T1_Unigene_BMK.11505;T1_Unigene_BMK.12216;T1_Unigene_BMK.12218;T1_Unigene_BMK.12219;T1_Unigene_BMK.12221;T1_Unigene_BMK.12265;T1_Unigene_BMK.12380;T1_Unigene_BMK.12454;T1_Unigene_BMK.12587;T1_Unigene_BMK.12727;T1_Unigene_BMK.12728;T1_Unigene_BMK.1285;T1_Unigene_BMK.1303;T1_Unigene_BMK.1311;T1_U…	K03885+K03885+K03966+K02256+K02128+K00413+K02154+K02154+K02154+K02154+K05582+K02275+K02137+K03939+K00234+K00234+K02263+K02111+K02134+K03949+K02152+K00411+K02127+K03884+K03946+K03878+K00235+K02150+K02256+K00415+K01535+K01535+K01535+K00419+K02152+K02135+K11353+K03945+K03965+K02151+K03955+K01507+K00416+K00412+K02113+K02260+K02149+K01507+K02138+K02129+K00417+K03937+K00411+K02265+K03963+K02267+K03879+…
Protein processing in endoplasmic reticulum	ko04141	228	T1_Unigene_BMK.10221;T1_Unigene_BMK.10468;T1_Unigene_BMK.10549;T1_Unigene_BMK.10888;T1_Unigene_BMK.11531;T1_Unigene_BMK.11608;T1_Unigene_BMK.11890;T1_Unigene_BMK.1225;T1_Unigene_BMK.12346;T1_Unigene_BMK.12483;T1_Unigene_BMK.12484;T1_Unigene_BMK.12498;T1_Unigene_BMK.13063;T1_Unigene_BMK.13210;T1_Unigene_BMK.13211;T1_Unigene_BMK.13229;T1_Unigene_BMK.13500;T1_Unigene_BMK.13847;T1_Unigene_BMK.13848;T…	K09580+K09486+K03283+K03094+K09503+K03283+K03094+K09503+K10578+K03283+K03283+K10956+K13525+K04079+K04079+K09562+K14007+K13993+K13993+K06689+K10088+K04079+K08057+K06689+K06689+K09503+K08288+K14015+K07151+K13525+K13525+K14007+K13719+K04079+K03283+K03283+K07342+K09580+K06689+K14007+K10575+K14011+K13993+K03237+K03237+K03094+K06689+K10666+K13989+K09481+K01230+K14004+K14012+K14018+K10956+K10666+K10666+…
Plant-pathogen interaction	ko04626	215	T1_Unigene_BMK.10113;T1_Unigene_BMK.10867;T1_Unigene_BMK.10885;T1_Unigene_BMK.10929;T1_Unigene_BMK.11179;T1_Unigene_BMK.11180;T1_Unigene_BMK.11521;T1_Unigene_BMK.11802;T1_Unigene_BMK.12085;T1_Unigene_BMK.12163;T1_Unigene_BMK.12770;T1_Unigene_BMK.13190;T1_Unigene_BMK.13210;T1_Unigene_BMK.13267;T1_Unigene_BMK.13777;T1_Unigene_BMK.13814;T1_Unigene_BMK.15706;T1_Unigene_BMK.15755;T1_Unigene_BMK.15815;…	K13448+K13426+K05391+K13448+K13412+K13412+K00864+K13447+K13448+K05391+K13448+K13412+K04079+K05391+K02183+K13448+K13448+K13448+K14512+K13449+K13448+K13448+K13412+K13412+K13412+K13448+K04079+K13448+K13448+K13448+K13428+K13448+K13464+K13448+K13414+K13412+K13447+K13448+K13412+K13412+K13464+K13464+K13464+K13464+K13457+K13448+K13464+K13448+K13460+K13447+K13447+K14512+K04368+K13426+K13448+K13412+K13412+…
RNA transport	ko03013	204	T1_Unigene_BMK.10059;T1_Unigene_BMK.10207;T1_Unigene_BMK.10327;T1_Unigene_BMK.10426;T1_Unigene_BMK.10469;T1_Unigene_BMK.10847;T1_Unigene_BMK.10998;T1_Unigene_BMK.11717;T1_Unigene_BMK.11749;T1_Unigene_BMK.12256;T1_Unigene_BMK.12337;T1_Unigene_BMK.13473;T1_Unigene_BMK.13589;T1_Unigene_BMK.13823;T1_Unigene_BMK.14359;T1_Unigene_BMK.14710;T1_Unigene_BMK.15386;T1_Unigene_BMK.15677;T1_Unigene_BMK.16202;…	K12877+K03253+K07936+K03257+K03257+K03537+K07936+K03262+K13126+K03254+K03259+K03113+K03259+K13126+K03252+K12160+K14298+K03251+K05019+K14290+K03236+K03236+K12160+K12160+K03252+K03257+K14312+K13176+K13171+K03237+K03237+K03231+K03242+K03242+K14326+K10577+K12160+K14004+K03539+K03539+K14289+K03241+K03254+K03251+K03253+K13151+K14320+K03239+K13137+K00974+K03238+K03245+K14321+K03231+K14310+K14318+K13114+…
Glycolysis / Gluconeogenesis	ko00010	196	T1_Unigene_BMK.10119;T1_Unigene_BMK.10300;T1_Unigene_BMK.10301;T1_Unigene_BMK.10765;T1_Unigene_BMK.11218;T1_Unigene_BMK.11528;T1_Unigene_BMK.11569;T1_Unigene_BMK.11590;T1_Unigene_BMK.11621;T1_Unigene_BMK.11754;T1_Unigene_BMK.12586;T1_Unigene_BMK.12734;T1_Unigene_BMK.12736;T1_Unigene_BMK.13057;T1_Unigene_BMK.13388;T1_Unigene_BMK.13467;T1_Unigene_BMK.13835;T1_Unigene_BMK.14279;T1_Unigene_BMK.14329;…	K14085+K01623+K01623+K00873+K01623+K13951+K00873+K01596+K00134+K00873+K00927+K00627+K00627+K00873+K01623+K00161+K00121+K00016+K01623+K14085+K01834+K01835+K01568+K03841+K00134+K01689+K01623+K01623+K00161+K00927+K00927+K00001+K01792+K01689+K00161+K01623+K00927+K00627+K00627+K01792+K01834+K00850+K01792+K00134+K00873+K00850+K00844+K00850+K00001+K00873+K01785+K00162+K00121+K00873+K00850+K14085+K01623+…
Purine metabolism	ko00230	193	T1_Unigene_BMK.10438;T1_Unigene_BMK.10765;T1_Unigene_BMK.11569;T1_Unigene_BMK.11655;T1_Unigene_BMK.11656;T1_Unigene_BMK.11657;T1_Unigene_BMK.11658;T1_Unigene_BMK.11745;T1_Unigene_BMK.11754;T1_Unigene_BMK.11977;T1_Unigene_BMK.1254;T1_Unigene_BMK.13057;T1_Unigene_BMK.14064;T1_Unigene_BMK.14380;T1_Unigene_BMK.14888;T1_Unigene_BMK.15038;T1_Unigene_BMK.15551;T1_Unigene_BMK.16138;T1_Unigene_BMK.16582;T…	K00940+K00873+K00873+K00602+K00602+K00602+K00602+K03011+K00873+K01756+K03042+K00873+K00759+K01587+K10808+K01835+K02685+K14721+K02321+K03015+K01939+K01939+K01756+K03025+K03024+K03787+K00860+K14641+K00860+K10808+K01510+K01510+K00856+K00759+K00948+K00088+K00088+K00760+K01952+K01519+K02320+K02325+K03023+K00873+K00860+K03026+K03026+K00939+K01756+K01488+K00602+K00759+K03013+K00365+K00873+K00940+K13811+…
Spliceosome	ko03040	189	T1_Unigene_BMK.10059;T1_Unigene_BMK.10139;T1_Unigene_BMK.10140;T1_Unigene_BMK.10178;T1_Unigene_BMK.10504;T1_Unigene_BMK.10549;T1_Unigene_BMK.11214;T1_Unigene_BMK.11608;T1_Unigene_BMK.12065;T1_Unigene_BMK.12483;T1_Unigene_BMK.12484;T1_Unigene_BMK.12714;T1_Unigene_BMK.12837;T1_Unigene_BMK.13158;T1_Unigene_BMK.13198;T1_Unigene_BMK.13801;T1_Unigene_BMK.13978;T1_Unigene_BMK.14005;T1_Unigene_BMK.14559;…	K12877+K11093+K11093+K11096+K12626+K03283+K11094+K03283+K12852+K03283+K03283+K11097+K12833+K12893+K12829+K12621+K11093+K12822+K12832+K12823+K12869+K12627+K12861+K12623+K11099+K03283+K03283+K12834+K12837+K12856+K12811+K11098+K12823+K12858+K12826+K12849+K12845+K12872+K12834+K12816+K06063+K12856+K03283+K12873+K12827+K12856+K12865+K12854+K09567+K12859+K12856+K12868+K12890+K11093+K03283+K11095+K12883+…
Starch and sucrose metabolism	ko00500	184	T1_Unigene_BMK.1018;T1_Unigene_BMK.10197;T1_Unigene_BMK.11144;T1_Unigene_BMK.12036;T1_Unigene_BMK.12201;T1_Unigene_BMK.12335;T1_Unigene_BMK.12435;T1_Unigene_BMK.12893;T1_Unigene_BMK.1403;T1_Unigene_BMK.14724;T1_Unigene_BMK.15005;T1_Unigene_BMK.15038;T1_Unigene_BMK.16133;T1_Unigene_BMK.16134;T1_Unigene_BMK.1647;T1_Unigene_BMK.16791;T1_Unigene_BMK.18191;T1_Unigene_BMK.18454;T1_Unigene_BMK.19164;T1_…	K00688+K00963+K01187+K01187+K01179+K05350+K00695+K01178+K00963+K00847+K00688+K01835+K08679+K08679+K01176+K01188+K01193+K00975+K01193+K01193+K13648+K00975+K01179+K01179+K01051+K01184+K00697+K00688+K13648+K13648+K00844+K01188+K01179+K00975+K00700+K00700+K08679+K00963+K01051+K00975+K00975+K05350+K13648+K01184+K00695+K08679+K00847+K13648+K13648+K00696+K01188+K00844+K01087+K00697+K00695+K00696+K01193+…
Amino sugar and nucleotide sugar metabolism	ko00520	158	T1_Unigene_BMK.10197;T1_Unigene_BMK.1261;T1_Unigene_BMK.1403;T1_Unigene_BMK.14699;T1_Unigene_BMK.14724;T1_Unigene_BMK.15033;T1_Unigene_BMK.15038;T1_Unigene_BMK.16133;T1_Unigene_BMK.16134;T1_Unigene_BMK.17393;T1_Unigene_BMK.17569;T1_Unigene_BMK.18441;T1_Unigene_BMK.18454;T1_Unigene_BMK.18916;T1_Unigene_BMK.19266;T1_Unigene_BMK.19267;T1_Unigene_BMK.19514;T1_Unigene_BMK.20723;T1_Unigene_BMK.20881;T1…	K00963+K01183+K00963+K00971+K00847+K01809+K01835+K08679+K08679+K01183+K01183+K01711+K00975+K12449+K01183+K01183+K13648+K02377+K00975+K12373+K00971+K13648+K12448+K12373+K12373+K13648+K00844+K12373+K00975+K00849+K08679+K00963+K00975+K01784+K00975+K12450+K13648+K00326+K08679+K12451+K00847+K05305+K01784+K13648+K13648+K01784+K01183+K00844+K12446+K00621+K12448+K01183+K10046+K12446+K00972+K00972+K00972+…
Phenylpropanoid biosynthesis	ko00940	144	T1_Unigene_BMK.10818;T1_Unigene_BMK.11445;T1_Unigene_BMK.11689;T1_Unigene_BMK.11731;T1_Unigene_BMK.11866;T1_Unigene_BMK.12228;T1_Unigene_BMK.12335;T1_Unigene_BMK.12658;T1_Unigene_BMK.12663;T1_Unigene_BMK.13005;T1_Unigene_BMK.13006;T1_Unigene_BMK.1330;T1_Unigene_BMK.15258;T1_Unigene_BMK.1625;T1_Unigene_BMK.16495;T1_Unigene_BMK.16543;T1_Unigene_BMK.16552;T1_Unigene_BMK.16791;T1_Unigene_BMK.16991;T1…	K13067+K00430+K13068+K10775+K00430+K00430+K05350+K09755+K00430+K00430+K00430+K00430+K01904+K00083+K12356+K00083+K00430+K01188+K00430+K00083+K00430+K00430+K00430+K09757+K09757+K00430+K00083+K00083+K00430+K00430+K00430+K00083+K00430+K09756+K10775+K10775+K00430+K00430+K00430+K00430+K00430+K00430+K00430+K01188+K00430+K00430+K05350+K10775+K00430+K01904+K00588+K00430+K00083+K01904+K12355+K09753+K01188+…
Endocytosis	ko04144	132	T1_Unigene_BMK.10549;T1_Unigene_BMK.11608;T1_Unigene_BMK.12483;T1_Unigene_BMK.12484;T1_Unigene_BMK.12554;T1_Unigene_BMK.12870;T1_Unigene_BMK.13540;T1_Unigene_BMK.1358;T1_Unigene_BMK.1380;T1_Unigene_BMK.16541;T1_Unigene_BMK.17081;T1_Unigene_BMK.17173;T1_Unigene_BMK.17788;T1_Unigene_BMK.17926;T1_Unigene_BMK.18024;T1_Unigene_BMK.18081;T1_Unigene_BMK.18083;T1_Unigene_BMK.18492;T1_Unigene_BMK.18679;T1…	K03283+K03283+K03283+K03283+K12198+K00889+K11826+K00889+K00889+K04646+K04646+K07897+K11866+K04646+K12193+K03283+K03283+K12492+K01115+K01115+K01528+K04646+K00889+K12193+K12198+K12471+K12471+K12471+K12197+K12194+K11866+K03283+K00889+K00889+K01115+K04646+K12194+K00889+K00889+K11827+K03283+K12184+K04646+K03283+K03283+K03283+K07897+K12199+K00889+K00889+K10591+K01115+K12489+K00889+K12190+K01528+K12196+…
Ribosome biogenesis in eukaryotes	ko03008	131	T1_Unigene_BMK.10327;T1_Unigene_BMK.10640;T1_Unigene_BMK.10643;T1_Unigene_BMK.10847;T1_Unigene_BMK.10998;T1_Unigene_BMK.11600;T1_Unigene_BMK.12029;T1_Unigene_BMK.12283;T1_Unigene_BMK.12817;T1_Unigene_BMK.13825;T1_Unigene_BMK.15431;T1_Unigene_BMK.16281;T1_Unigene_BMK.16487;T1_Unigene_BMK.16995;T1_Unigene_BMK.17373;T1_Unigene_BMK.17653;T1_Unigene_BMK.18025;T1_Unigene_BMK.18072;T1_Unigene_BMK.19508;…	K07936+K14536+K11128+K03537+K07936+K14536+K14569+K14563+K14539+K11108+K14571+K14290+K14549+K07178+K14563+K14574+K14563+K11128+K14573+K03097+K14535+K12845+K03539+K03539+K14537+K11129+K11131+K03097+K03097+K14573+K14570+K03264+K12619+K11883+K07178+K14561+K06943+K02218+K12619+K12619+K02218+K02218+K02218+K07562+K14545+K07179+K14569+K14553+K14539+K14556+K14565+K03115+K14567+K14555+K03097+K14536+K14572+…
Pyruvate metabolism	ko00620	130	T1_Unigene_BMK.10119;T1_Unigene_BMK.10131;T1_Unigene_BMK.10765;T1_Unigene_BMK.11569;T1_Unigene_BMK.11590;T1_Unigene_BMK.11652;T1_Unigene_BMK.11754;T1_Unigene_BMK.12646;T1_Unigene_BMK.12734;T1_Unigene_BMK.12736;T1_Unigene_BMK.13057;T1_Unigene_BMK.13467;T1_Unigene_BMK.14279;T1_Unigene_BMK.14597;T1_Unigene_BMK.15794;T1_Unigene_BMK.16509;T1_Unigene_BMK.16934;T1_Unigene_BMK.20215;T1_Unigene_BMK.20360;…	K14085+K01958+K00873+K00873+K01596+K00626+K00873+K01595+K00627+K00627+K00873+K00161+K00016+K14085+K00028+K00161+K00029+K00161+K00627+K00627+K00026+K00873+K00873+K00162+K00873+K14085+K00627+K00128+K00025+K00029+K00026+K00026+K02160+K00026+K00161+K00162+K00011+K00028+K01006+K00626+K00382+K00162+K00161+K01649+K01649+K00029+K00382+K00128+K00873+K00873+K00873+K01596+K00128+K01595+K01595+K00382+K00025+…
Ubiquitin mediated proteolysis	ko04120	130	T1_Unigene_BMK.10102;T1_Unigene_BMK.1081;T1_Unigene_BMK.10888;T1_Unigene_BMK.11890;T1_Unigene_BMK.12346;T1_Unigene_BMK.12895;T1_Unigene_BMK.13149;T1_Unigene_BMK.13850;T1_Unigene_BMK.14011;T1_Unigene_BMK.14012;T1_Unigene_BMK.1463;T1_Unigene_BMK.15611;T1_Unigene_BMK.15646;T1_Unigene_BMK.15798;T1_Unigene_BMK.16074;T1_Unigene_BMK.16760;T1_Unigene_BMK.17686;T1_Unigene_BMK.17974;T1_Unigene_BMK.17987;T1…	K10592+K10143+K03094+K03094+K10578+K10592+K10592+K10592+K10610+K10610+K06689+K10592+K06689+K06689+K10143+K10573+K10606+K04506+K03872+K10592+K06689+K10575+K03094+K06689+K10577+K03350+K03350+K03355+K03868+K10610+K10575+K10575+K03358+K10601+K10570+K10598+K06689+K03364+K10571+K10573+K04506+K09561+K03352+K10577+K03350+K10140+K04506+K10576+K04554+K03349+K03178+K10599+K10599+K10591+K03178+K10597+K10685+…
Pyrimidine metabolism	ko00240	127	T1_Unigene_BMK.10438;T1_Unigene_BMK.11745;T1_Unigene_BMK.1254;T1_Unigene_BMK.14888;T1_Unigene_BMK.15551;T1_Unigene_BMK.16138;T1_Unigene_BMK.16582;T1_Unigene_BMK.16916;T1_Unigene_BMK.17475;T1_Unigene_BMK.17815;T1_Unigene_BMK.17897;T1_Unigene_BMK.17898;T1_Unigene_BMK.18062;T1_Unigene_BMK.18070;T1_Unigene_BMK.1811;T1_Unigene_BMK.18167;T1_Unigene_BMK.18456;T1_Unigene_BMK.18587;T1_Unigene_BMK.18988;T1…	K00940+K03011+K03042+K10808+K02685+K14721+K02321+K03015+K03025+K03024+K00384+K00384+K00876+K01520+K00207+K03787+K14641+K01937+K10808+K01510+K01510+K01519+K02320+K00384+K02325+K03023+K01956+K03026+K03026+K00876+K00876+K00857+K01489+K03013+K00940+K13998+K13800+K13800+K13800+K00207+K02328+K10807+K03017+K03000+K00962+K00761+K02999+K00940+K03002+K01510+K00254+K03020+K03018+K01520+K13421+K02327+K01510+…
Citrate cycle (TCA cycle)	ko00020	122	T1_Unigene_BMK.10013;T1_Unigene_BMK.10014;T1_Unigene_BMK.10015;T1_Unigene_BMK.10016;T1_Unigene_BMK.10131;T1_Unigene_BMK.11590;T1_Unigene_BMK.12209;T1_Unigene_BMK.12727;T1_Unigene_BMK.12728;T1_Unigene_BMK.12734;T1_Unigene_BMK.12736;T1_Unigene_BMK.13467;T1_Unigene_BMK.14143;T1_Unigene_BMK.14144;T1_Unigene_BMK.14575;T1_Unigene_BMK.15565;T1_Unigene_BMK.15763;T1_Unigene_BMK.16509;T1_Unigene_BMK.18652;…	K01648+K01648+K01648+K01648+K01958+K01596+K01648+K00234+K00234+K00627+K00627+K00161+K00031+K00031+K00235+K01679+K00030+K00161+K01647+K01647+K01647+K00161+K00627+K00627+K00026+K01681+K01681+K01681+K01681+K01647+K00030+K00162+K00031+K00030+K00658+K00031+K01648+K00627+K00025+K00026+K01681+K01647+K00026+K00237+K01648+K00026+K00161+K00162+K00234+K01681+K00382+K00162+K00161+K00164+K00658+K00382+K01596+…
mRNA surveillance pathway	ko03015	121	T1_Unigene_BMK.10059;T1_Unigene_BMK.11204;T1_Unigene_BMK.11749;T1_Unigene_BMK.13253;T1_Unigene_BMK.13823;T1_Unigene_BMK.15730;T1_Unigene_BMK.16146;T1_Unigene_BMK.17411;T1_Unigene_BMK.18275;T1_Unigene_BMK.20269;T1_Unigene_BMK.20482;T1_Unigene_BMK.20806;T1_Unigene_BMK.21789;T1_Unigene_BMK.23781;T1_Unigene_BMK.24090;T1_Unigene_BMK.24303;T1_Unigene_BMK.26038;T1_Unigene_BMK.26261;T1_Unigene_BMK.27720;…	K12877+K14376+K13126+K04354+K13126+K06965+K00565+K04382+K04382+K11584+K13171+K14326+K14411+K03267+K06100+K14411+K13114+K14325+K11583+K12883+K11584+K14327+K11584+K13917+K14328+K11584+K11584+K06100+K11583+K14401+K04382+K14407+K14411+K11584+K14376+K03456+K14408+K13025+K04354+K04354+K04382+K11583+K14376+K14326+K14411+K08873+K13917+K14396+K03265+K14411+K12812+K13025+K04354+K11583+K04354+K12812+K14324+…
Phagosome	ko04145	117	T1_Unigene_BMK.12216;T1_Unigene_BMK.12218;T1_Unigene_BMK.12219;T1_Unigene_BMK.1222;T1_Unigene_BMK.12221;T1_Unigene_BMK.12498;T1_Unigene_BMK.12816;T1_Unigene_BMK.13481;T1_Unigene_BMK.13905;T1_Unigene_BMK.14606;T1_Unigene_BMK.14855;T1_Unigene_BMK.1543;T1_Unigene_BMK.17097;T1_Unigene_BMK.17173;T1_Unigene_BMK.17271;T1_Unigene_BMK.17779;T1_Unigene_BMK.18323;T1_Unigene_BMK.18347;T1_Unigene_BMK.19742;T1…	K02154+K02154+K02154+K07375+K02154+K10956+K01365+K02152+K01365+K02150+K07375+K08057+K02152+K07897+K07375+K02151+K07342+K07374+K08488+K05692+K02149+K09481+K10956+K01365+K07375+K02155+K08488+K02147+K08054+K02146+K02155+K08492+K01365+K02148+K02154+K02144+K05692+K05692+K07375+K05692+K07375+K07375+K07375+K07897+K00914+K00921+K02144+K00921+K08057+K02154+K02145+K10956+K07374+K01365+K03990+K01365+K08057+…
Arginine and proline metabolism	ko00330	116	T1_Unigene_BMK.10119;T1_Unigene_BMK.10258;T1_Unigene_BMK.12558;T1_Unigene_BMK.12559;T1_Unigene_BMK.13316;T1_Unigene_BMK.13780;T1_Unigene_BMK.14274;T1_Unigene_BMK.14597;T1_Unigene_BMK.14807;T1_Unigene_BMK.14967;T1_Unigene_BMK.15056;T1_Unigene_BMK.16210;T1_Unigene_BMK.16456;T1_Unigene_BMK.16615;T1_Unigene_BMK.16655;T1_Unigene_BMK.16656;T1_Unigene_BMK.17321;T1_Unigene_BMK.18073;T1_Unigene_BMK.18452;…	K14085+K14677+K00318+K00318+K14677+K01915+K01915+K14085+K00472+K00472+K00261+K00472+K00472+K01259+K00261+K00261+K00286+K00261+K00797+K00933+K01915+K01476+K01611+K01611+K00294+K00797+K00318+K00261+K00472+K00797+K00261+K00262+K14085+K00128+K00813+K01611+K01940+K00818+K00145+K10536+K00620+K00294+K14682+K01427+K01755+K00128+K01583+K00819+K00261+K00819+K00934+K14455+K00128+K01583+K00472+K10536+K01611+…
Cysteine and methionine metabolism	ko00270	115	T1_Unigene_BMK.11925;T1_Unigene_BMK.14279;T1_Unigene_BMK.15338;T1_Unigene_BMK.15792;T1_Unigene_BMK.16698;T1_Unigene_BMK.16990;T1_Unigene_BMK.17091;T1_Unigene_BMK.17961;T1_Unigene_BMK.18074;T1_Unigene_BMK.18240;T1_Unigene_BMK.18452;T1_Unigene_BMK.18810;T1_Unigene_BMK.20276;T1_Unigene_BMK.21264;T1_Unigene_BMK.21341;T1_Unigene_BMK.21342;T1_Unigene_BMK.21451;T1_Unigene_BMK.21660;T1_Unigene_BMK.22286;…	K08963+K00016+K01739+K05933+K05933+K01738+K01738+K00928+K08967+K01761+K00797+K00549+K00640+K01251+K01611+K01611+K01738+K01738+K00815+K00815+K00797+K00549+K01762+K00797+K00549+K00549+K05933+K00547+K01251+K00547+K00558+K00928+K01738+K01760+K00813+K01611+K01011+K00789+K00789+K01739+K00815+K00549+K01738+K12524+K01011+K00558+K00133+K00558+K00928+K00558+K01251+K01758+K00789+K14455+K01251+K01758+K01611+…
Peroxisome	ko04146	113	T1_Unigene_BMK.10305;T1_Unigene_BMK.10465;T1_Unigene_BMK.10656;T1_Unigene_BMK.11898;T1_Unigene_BMK.13453;T1_Unigene_BMK.14010;T1_Unigene_BMK.14143;T1_Unigene_BMK.14144;T1_Unigene_BMK.14309;T1_Unigene_BMK.15357;T1_Unigene_BMK.15407;T1_Unigene_BMK.16335;T1_Unigene_BMK.16464;T1_Unigene_BMK.16465;T1_Unigene_BMK.16679;T1_Unigene_BMK.16680;T1_Unigene_BMK.17065;T1_Unigene_BMK.17531;T1_Unigene_BMK.17532;…	K00232+K04564+K13237+K12663+K00232+K00232+K00031+K00031+K04564+K04565+K01897+K11517+K00232+K00232+K11517+K11517+K13339+K00232+K00232+K00232+K00232+K00869+K13343+K13343+K01897+K01897+K03781+K01897+K11147+K13337+K13237+K04565+K01897+K11517+K13348+K00031+K13341+K13335+K00031+K03781+K00232+K01897+K01897+K01897+K13336+K07513+K13342+K00232+K13343+K01897+K00232+K13338+K00106+K03781+K01897+K12261+K00232+…
Carbon fixation in photosynthetic organisms	ko00710	112	T1_Unigene_BMK.10300;T1_Unigene_BMK.10301;T1_Unigene_BMK.10765;T1_Unigene_BMK.11032;T1_Unigene_BMK.11218;T1_Unigene_BMK.11569;T1_Unigene_BMK.11754;T1_Unigene_BMK.12517;T1_Unigene_BMK.12646;T1_Unigene_BMK.12711;T1_Unigene_BMK.13057;T1_Unigene_BMK.14329;T1_Unigene_BMK.15071;T1_Unigene_BMK.15588;T1_Unigene_BMK.15794;T1_Unigene_BMK.16360;T1_Unigene_BMK.16361;T1_Unigene_BMK.16934;T1_Unigene_BMK.17407;…	K01623+K01623+K00873+K00615+K01623+K00873+K00873+K00814+K01595+K01100+K00873+K01623+K01100+K03841+K00028+K01623+K01623+K00029+K00927+K00927+K05298+K05298+K00615+K00927+K05298+K01783+K00026+K00873+K01100+K00873+K01602+K00873+K01623+K01623+K00615+K01803+K00813+K00025+K00029+K00026+K00026+K00026+K03841+K00028+K01006+K00855+K03841+K00029+K01807+K00873+K00873+K00873+K01595+K01595+K01623+K00615+K01803+…
Phenylalanine metabolism	ko00360	105	T1_Unigene_BMK.11445;T1_Unigene_BMK.11731;T1_Unigene_BMK.11866;T1_Unigene_BMK.12228;T1_Unigene_BMK.12495;T1_Unigene_BMK.12663;T1_Unigene_BMK.13005;T1_Unigene_BMK.13006;T1_Unigene_BMK.1330;T1_Unigene_BMK.15258;T1_Unigene_BMK.16552;T1_Unigene_BMK.16991;T1_Unigene_BMK.17429;T1_Unigene_BMK.17599;T1_Unigene_BMK.1770;T1_Unigene_BMK.18447;T1_Unigene_BMK.19034;T1_Unigene_BMK.20448;T1_Unigene_BMK.20473;T1…	K00430+K10775+K00430+K00430+K00276+K00430+K00430+K00430+K00430+K01904+K00430+K00430+K00430+K00430+K00430+K00430+K00430+K00430+K00457+K00430+K00430+K00430+K10775+K10775+K00815+K00815+K00430+K00430+K00430+K00430+K00430+K00430+K00430+K00430+K00430+K10775+K00430+K01904+K00588+K00430+K01904+K00276+K00813+K00817+K01904+K00815+K00430+K09754+K00430+K01904+K00487+K14455+K00430+K00430+K00430+K00430+K00430+…
Glycerophospholipid metabolism	ko00564	97	T1_Unigene_BMK.10091;T1_Unigene_BMK.10342;T1_Unigene_BMK.10343;T1_Unigene_BMK.10802;T1_Unigene_BMK.11315;T1_Unigene_BMK.1165;T1_Unigene_BMK.12008;T1_Unigene_BMK.12569;T1_Unigene_BMK.13786;T1_Unigene_BMK.14454;T1_Unigene_BMK.16252;T1_Unigene_BMK.16254;T1_Unigene_BMK.16255;T1_Unigene_BMK.16839;T1_Unigene_BMK.17807;T1_Unigene_BMK.18294;T1_Unigene_BMK.18679;T1_Unigene_BMK.18815;T1_Unigene_BMK.19145;T…	K13508+K00981+K00981+K00111+K01613+K13508+K00968+K00006+K14674+K00901+K01114+K01114+K01114+K00630+K00968+K01058+K01115+K08730+K01115+K00981+K08730+K14156+K01114+K13513+K08730+K00999+K00006+K13513+K01115+K13511+K00993+K13523+K01613+K01114+K00981+K13508+K13508+K13510+K14674+K13508+K13523+K00630+K00967+K01115+K13510+K01115+K13508+K13508+K01114+K00968+K00111+K13508+K01115+K13508+K01115+K01114+K01115+…
Glutathione metabolism	ko00480	96	T1_Unigene_BMK.1135;T1_Unigene_BMK.14143;T1_Unigene_BMK.14144;T1_Unigene_BMK.14282;T1_Unigene_BMK.14283;T1_Unigene_BMK.14888;T1_Unigene_BMK.15399;T1_Unigene_BMK.18452;T1_Unigene_BMK.18988;T1_Unigene_BMK.19104;T1_Unigene_BMK.19105;T1_Unigene_BMK.19403;T1_Unigene_BMK.19848;T1_Unigene_BMK.20213;T1_Unigene_BMK.2031;T1_Unigene_BMK.2048;T1_Unigene_BMK.22089;T1_Unigene_BMK.22516;T1_Unigene_BMK.23004;T1_…	K00799+K00031+K00031+K00799+K00799+K10808+K00036+K00797+K10808+K00681+K00681+K00432+K00799+K00799+K00799+K00799+K00432+K00797+K00434+K01255+K00797+K10807+K00031+K00031+K00432+K00434+K00432+K01919+K00681+K00681+K00036+K01256+K00799+K01920+K00383+K00383+K00033+K00799+K00799+K11140+K10808+K00799+K00033+K01256+K01920+K01255+K11140+K00033+K00797+K01919+K00036+K00432+K01255+K00799+K00799+K00432+K00681+…
Glycine, serine and threonine metabolism	ko00260	93	T1_Unigene_BMK.10070;T1_Unigene_BMK.10119;T1_Unigene_BMK.10252;T1_Unigene_BMK.12495;T1_Unigene_BMK.12676;T1_Unigene_BMK.14577;T1_Unigene_BMK.14597;T1_Unigene_BMK.1598;T1_Unigene_BMK.1599;T1_Unigene_BMK.16002;T1_Unigene_BMK.16004;T1_Unigene_BMK.1721;T1_Unigene_BMK.17961;T1_Unigene_BMK.19382;T1_Unigene_BMK.19837;T1_Unigene_BMK.23113;T1_Unigene_BMK.23575;T1_Unigene_BMK.23576;T1_Unigene_BMK.2415;T1_U…	K01620+K14085+K00600+K00276+K00058+K00552+K14085+K00600+K00600+K01079+K01079+K01620+K00928+K12235+K00827+K00058+K01733+K01733+K00058+K01696+K01696+K01733+K01733+K01696+K14085+K01079+K00928+K01696+K00600+K00276+K00872+K00600+K00281+K00872+K01733+K12524+K00382+K00133+K00605+K00382+K00928+K00600+K00827+K01754+K01758+K00382+K00314+K01758+K01620+K00831+K00058+K01733+K00281+K00130+K00382+K00382+K00831+…
Pentose phosphate pathway	ko00030	91	T1_Unigene_BMK.10300;T1_Unigene_BMK.10301;T1_Unigene_BMK.11032;T1_Unigene_BMK.11218;T1_Unigene_BMK.12596;T1_Unigene_BMK.13049;T1_Unigene_BMK.13388;T1_Unigene_BMK.14255;T1_Unigene_BMK.14256;T1_Unigene_BMK.14329;T1_Unigene_BMK.15038;T1_Unigene_BMK.15399;T1_Unigene_BMK.15588;T1_Unigene_BMK.15825;T1_Unigene_BMK.16360;T1_Unigene_BMK.16361;T1_Unigene_BMK.19141;T1_Unigene_BMK.20190;T1_Unigene_BMK.2029;T…	K01623+K01623+K00615+K01623+K01057+K01057+K01623+K01057+K01057+K01623+K01835+K00036+K03841+K01057+K01623+K01623+K00615+K00948+K01623+K00616+K01783+K00850+K00850+K00616+K00851+K00850+K01057+K01057+K00948+K00850+K01623+K01623+K00615+K00850+K03841+K00852+K00036+K03841+K00616+K00948+K01807+K00033+K00616+K01057+K01623+K00615+K00033+K03841+K00615+K00033+K00851+K01623+K01623+K01057+K00036+K01057+K01835+…
Fructose and mannose metabolism	ko00051	87	T1_Unigene_BMK.10300;T1_Unigene_BMK.10301;T1_Unigene_BMK.11218;T1_Unigene_BMK.13388;T1_Unigene_BMK.14329;T1_Unigene_BMK.14699;T1_Unigene_BMK.14724;T1_Unigene_BMK.15033;T1_Unigene_BMK.15588;T1_Unigene_BMK.16360;T1_Unigene_BMK.16361;T1_Unigene_BMK.18441;T1_Unigene_BMK.18850;T1_Unigene_BMK.2029;T1_Unigene_BMK.20723;T1_Unigene_BMK.2116;T1_Unigene_BMK.21755;T1_Unigene_BMK.21764;T1_Unigene_BMK.22713;T1…	K01623+K01623+K01623+K01623+K01623+K00971+K00847+K01809+K03841+K01623+K01623+K01711+K01805+K01623+K02377+K00008+K00850+K00971+K00850+K01103+K00844+K00850+K01218+K00850+K00895+K00847+K01623+K01623+K05305+K01803+K00844+K00011+K00850+K03841+K01809+K03841+K00847+K01103+K00847+K02377+K01623+K00844+K01803+K03841+K00011+K01803+K00847+K00895+K01809+K01623+K01623+K01809+K00847+K00850+K01711+K01809+K00844+…
Fatty acid metabolism	ko00071	86	T1_Unigene_BMK.10119;T1_Unigene_BMK.10305;T1_Unigene_BMK.10592;T1_Unigene_BMK.10593;T1_Unigene_BMK.11528;T1_Unigene_BMK.11652;T1_Unigene_BMK.12913;T1_Unigene_BMK.13453;T1_Unigene_BMK.13835;T1_Unigene_BMK.14010;T1_Unigene_BMK.14597;T1_Unigene_BMK.15407;T1_Unigene_BMK.16464;T1_Unigene_BMK.16465;T1_Unigene_BMK.17531;T1_Unigene_BMK.17532;T1_Unigene_BMK.17533;T1_Unigene_BMK.17534;T1_Unigene_BMK.17619;…	K14085+K00232+K09478+K09478+K13951+K00626+K09479+K00232+K00121+K00232+K14085+K01897+K00232+K00232+K00232+K00232+K00232+K00232+K01692+K00001+K01897+K01897+K01897+K00001+K01897+K00121+K14085+K00232+K01897+K01897+K00128+K01897+K00249+K00121+K07513+K00626+K00232+K00128+K01897+K00232+K07508+K00249+K01897+K00128+K00232+K00121+K00232+K07511+K00128+K00249+K00249+K00252+K01897+K00232+K00128+K00128+K01897+…
Pentose and glucuronate interconversions	ko00040	84	T1_Unigene_BMK.10197;T1_Unigene_BMK.12547;T1_Unigene_BMK.1403;T1_Unigene_BMK.15528;T1_Unigene_BMK.15529;T1_Unigene_BMK.18850;T1_Unigene_BMK.19150;T1_Unigene_BMK.19478;T1_Unigene_BMK.20742;T1_Unigene_BMK.20743;T1_Unigene_BMK.20744;T1_Unigene_BMK.20996;T1_Unigene_BMK.21459;T1_Unigene_BMK.21526;T1_Unigene_BMK.21641;T1_Unigene_BMK.21841;T1_Unigene_BMK.23174;T1_Unigene_BMK.23175;T1_Unigene_BMK.23301;T…	K00963+K01728+K00963+K01728+K01728+K01805+K01728+K01728+K01728+K01728+K01728+K01783+K01051+K01184+K01728+K01728+K01728+K01728+K01728+K01728+K01728+K01728+K00963+K01051+K00078+K00078+K01728+K01728+K01184+K00128+K00011+K01051+K00128+K01728+K01051+K00012+K00128+K00699+K01728+K00128+K01051+K00011+K00963+K01051+K00128+K00128+K01728+K01213+K01213+K01213+K01051+K01184+K01728+K01213+K01051+K01728+K01728+…
Inositol phosphate metabolism	ko00562	84	T1_Unigene_BMK.10011;T1_Unigene_BMK.11441;T1_Unigene_BMK.12870;T1_Unigene_BMK.12968;T1_Unigene_BMK.13455;T1_Unigene_BMK.1358;T1_Unigene_BMK.1380;T1_Unigene_BMK.13860;T1_Unigene_BMK.16252;T1_Unigene_BMK.16254;T1_Unigene_BMK.16255;T1_Unigene_BMK.17061;T1_Unigene_BMK.17062;T1_Unigene_BMK.18676;T1_Unigene_BMK.18780;T1_Unigene_BMK.1904;T1_Unigene_BMK.19327;T1_Unigene_BMK.19712;T1_Unigene_BMK.23135;T1_…	K00469+K05857+K00889+K05857+K00469+K00889+K00889+K00140+K01114+K01114+K01114+K05857+K05857+K00469+K00140+K05857+K00888+K00889+K01110+K01114+K01110+K00999+K01107+K00889+K00889+K01858+K00913+K05857+K01114+K00889+K00889+K01803+K01107+K05857+K05857+K00914+K00921+K00913+K00889+K00889+K00921+K01107+K00889+K00888+K00469+K00889+K01114+K00889+K00889+K05857+K05857+K01803+K00469+K01114+K01803+K10047+K00889+…
Proteasome	ko03050	84	T1_Unigene_BMK.11050;T1_Unigene_BMK.11548;T1_Unigene_BMK.12075;T1_Unigene_BMK.12705;T1_Unigene_BMK.13034;T1_Unigene_BMK.13909;T1_Unigene_BMK.1454;T1_Unigene_BMK.17844;T1_Unigene_BMK.19010;T1_Unigene_BMK.19011;T1_Unigene_BMK.20388;T1_Unigene_BMK.21493;T1_Unigene_BMK.2278;T1_Unigene_BMK.23074;T1_Unigene_BMK.23856;T1_Unigene_BMK.23928;T1_Unigene_BMK.24225;T1_Unigene_BMK.2502;T1_Unigene_BMK.25151;T1_…	K02734+K03062+K03038+K03038+K03032+K03063+K03039+K02727+K03039+K03039+K02736+K02739+K02737+K06700+K03029+K03031+K02728+K03032+K02729+K02730+K02737+K03035+K02731+K02738+K02726+K03036+K03064+K02732+K03038+K03062+K02735+K10881+K03061+K03033+K03036+K06699+K03032+K02725+K03036+K03028+K02737+K02739+K02725+K02725+K02739+K02732+K02729+K03028+K03030+K03032+K03066+K02726+K03028+K11599+K11599+K11599+K03032+…
Alanine, aspartate and glutamate metabolism	ko00250	83	T1_Unigene_BMK.10149;T1_Unigene_BMK.10434;T1_Unigene_BMK.11205;T1_Unigene_BMK.11977;T1_Unigene_BMK.12517;T1_Unigene_BMK.13780;T1_Unigene_BMK.14274;T1_Unigene_BMK.15056;T1_Unigene_BMK.16655;T1_Unigene_BMK.16656;T1_Unigene_BMK.17141;T1_Unigene_BMK.17142;T1_Unigene_BMK.1740;T1_Unigene_BMK.18073;T1_Unigene_BMK.18733;T1_Unigene_BMK.19046;T1_Unigene_BMK.19837;T1_Unigene_BMK.22168;T1_Unigene_BMK.22282;T…	K01953+K01953+K00135+K01756+K00814+K01915+K01915+K00261+K00261+K00261+K01939+K01939+K01756+K00261+K01915+K01580+K00827+K00294+K01956+K01756+K00261+K00261+K00262+K01953+K00813+K01940+K00264+K00278+K01953+K00294+K13566+K01755+K00764+K01756+K00827+K00261+K14455+K00764+K14455+K14455+K01756+K00261+K01915+K00261+K14454+K14454+K00813+K01580+K00813+K13524+K01915+K01580+K00764+K00135+K00135+K01580+K01955+…
RNA degradation	ko03018	82	T1_Unigene_BMK.10504;T1_Unigene_BMK.11749;T1_Unigene_BMK.12500;T1_Unigene_BMK.13801;T1_Unigene_BMK.13823;T1_Unigene_BMK.15078;T1_Unigene_BMK.16111;T1_Unigene_BMK.16149;T1_Unigene_BMK.17264;T1_Unigene_BMK.17332;T1_Unigene_BMK.17792;T1_Unigene_BMK.17793;T1_Unigene_BMK.19220;T1_Unigene_BMK.21553;T1_Unigene_BMK.22716;T1_Unigene_BMK.23909;T1_Unigene_BMK.2513;T1_Unigene_BMK.25536;T1_Unigene_BMK.26014;T…	K12626+K13126+K10643+K12621+K13126+K12627+K12589+K01689+K12623+K03681+K10643+K10643+K01689+K01148+K07573+K12607+K12614+K12619+K12605+K12605+K12605+K00962+K12603+K12619+K12619+K12617+K12585+K14443+K12581+K04043+K12591+K12614+K12600+K01689+K12580+K00962+K14442+K04077+K12598+K12604+K12619+K12608+K01689+K04077+K13126+K12619+K01689+K12614+K12616+K01689+K12602+K12614+K12580+K13126+K12608+K01689+K12625+…
Nucleotide excision repair	ko03420	75	T1_Unigene_BMK.10270;T1_Unigene_BMK.10627;T1_Unigene_BMK.1128;T1_Unigene_BMK.11691;T1_Unigene_BMK.14011;T1_Unigene_BMK.14012;T1_Unigene_BMK.16636;T1_Unigene_BMK.18515;T1_Unigene_BMK.18645;T1_Unigene_BMK.18764;T1_Unigene_BMK.20907;T1_Unigene_BMK.211;T1_Unigene_BMK.21899;T1_Unigene_BMK.22761;T1_Unigene_BMK.23153;T1_Unigene_BMK.23516;T1_Unigene_BMK.23529;T1_Unigene_BMK.2374;T1_Unigene_BMK.24310;T1_U…	K02202+K07466+K10842+K02202+K10610+K10610+K07466+K10747+K07466+K07466+K03143+K02202+K02325+K07466+K02202+K07466+K03868+K10610+K07466+K10839+K02328+K10842+K10570+K10844+K10849+K10839+K06634+K07466+K10747+K10846+K10140+K10739+K10754+K10838+K02327+K03141+K10609+K10841+K02324+K10756+K02202+K02202+K02202+K02202+K02325+K02202+K04802+K07466+K07466+K10845+K02325+K10739+K10755+K03868+K07466+K04802+K10755+…
Tryptophan metabolism	ko00380	72	T1_Unigene_BMK.10119;T1_Unigene_BMK.10557;T1_Unigene_BMK.11652;T1_Unigene_BMK.12509;T1_Unigene_BMK.13749;T1_Unigene_BMK.14597;T1_Unigene_BMK.14946;T1_Unigene_BMK.15520;T1_Unigene_BMK.15521;T1_Unigene_BMK.15681;T1_Unigene_BMK.15861;T1_Unigene_BMK.15862;T1_Unigene_BMK.17619;T1_Unigene_BMK.18971;T1_Unigene_BMK.18972;T1_Unigene_BMK.2064;T1_Unigene_BMK.20857;T1_Unigene_BMK.22206;T1_Unigene_BMK.2281;T1…	K14085+K11817+K00626+K11816+K01237+K14085+K11817+K11817+K11817+K11817+K11820+K11820+K01692+K01237+K01237+K11816+K03781+K11820+K11816+K14085+K03781+K11816+K00128+K11821+K01867+K00626+K11813+K00164+K00128+K11818+K03781+K00128+K00816+K11816+K07511+K00128+K11816+K00252+K03781+K11816+K03781+K11816+K03781+K01237+K11816+K00128+K00128+K01237+K03781+K01501+K11821+K01237+K03781+K11821+K03781+K14085+K03781+…
Valine, leucine and isoleucine degradation	ko00280	71	T1_Unigene_BMK.10119;T1_Unigene_BMK.10592;T1_Unigene_BMK.10593;T1_Unigene_BMK.11652;T1_Unigene_BMK.13860;T1_Unigene_BMK.14597;T1_Unigene_BMK.17619;T1_Unigene_BMK.18780;T1_Unigene_BMK.19549;T1_Unigene_BMK.20897;T1_Unigene_BMK.21537;T1_Unigene_BMK.23931;T1_Unigene_BMK.23932;T1_Unigene_BMK.24084;T1_Unigene_BMK.26084;T1_Unigene_BMK.26974;T1_Unigene_BMK.27323;T1_Unigene_BMK.28058;T1_Unigene_BMK.28099;…	K14085+K09478+K09478+K00626+K00140+K14085+K01692+K00140+K00166+K00020+K00826+K00826+K00826+K05605+K14085+K00826+K00167+K00128+K00826+K01969+K00249+K05605+K09699+K07513+K00626+K00382+K00382+K00128+K01969+K00826+K07508+K00249+K00128+K00382+K07511+K00128+K00249+K00249+K00826+K00826+K00128+K00128+K00382+K00382+K00826+K13524+K00382+K07513+K05605+K01640+K00826+K14085+K00253+K00249+K00128+K01968+K00826+…
Limonene and pinene degradation	ko00903	69	T1_Unigene_BMK.1137;T1_Unigene_BMK.12758;T1_Unigene_BMK.16282;T1_Unigene_BMK.16283;T1_Unigene_BMK.16284;T1_Unigene_BMK.17619;T1_Unigene_BMK.17979;T1_Unigene_BMK.18197;T1_Unigene_BMK.18198;T1_Unigene_BMK.19095;T1_Unigene_BMK.20163;T1_Unigene_BMK.20164;T1_Unigene_BMK.20165;T1_Unigene_BMK.20271;T1_Unigene_BMK.20272;T1_Unigene_BMK.21671;T1_Unigene_BMK.21821;T1_Unigene_BMK.22475;T1_Unigene_BMK.24373;T…	K00517+K00517+K00517+K00517+K00517+K01692+K00517+K00517+K00517+K00517+K00517+K00517+K00517+K00517+K00517+K00517+K00517+K00517+K00517+K00517+K00517+K00517+K00517+K00517+K00128+K00517+K00517+K00517+K00517+K00128+K00517+K00517+K00517+K00517+K00517+K00517+K00517+K00517+K00517+K00517+K00128+K00128+K00517+K00517+K00517+K00517+K00517+K01076+K01076+K00517+K00517+K00517+K00517+K00517+K00517+K00517+K00128+…
Nitrogen metabolism	ko00910	69	T1_Unigene_BMK.10149;T1_Unigene_BMK.10434;T1_Unigene_BMK.11731;T1_Unigene_BMK.13780;T1_Unigene_BMK.14274;T1_Unigene_BMK.15056;T1_Unigene_BMK.15823;T1_Unigene_BMK.16655;T1_Unigene_BMK.16656;T1_Unigene_BMK.17582;T1_Unigene_BMK.18073;T1_Unigene_BMK.18185;T1_Unigene_BMK.18554;T1_Unigene_BMK.18733;T1_Unigene_BMK.22204;T1_Unigene_BMK.22205;T1_Unigene_BMK.23386;T1_Unigene_BMK.25175;T1_Unigene_BMK.25410;…	K01953+K01953+K10775+K01915+K01915+K00261+K01725+K00261+K00261+K01672+K00261+K01673+K01674+K01915+K10775+K10775+K00261+K00261+K00262+K10775+K01673+K01673+K01673+K00366+K01760+K01953+K00264+K01953+K00360+K00605+K00284+K00261+K01758+K01674+K01758+K01673+K00261+K01915+K00261+K01673+K01673+K01673+K00366+K01673+K01674+K01915+K01501+K01673+K01674+K01674+K01673+K01915+K01455+K00366+K00605+K10775+K01953+…
Phosphatidylinositol signaling system	ko04070	69	T1_Unigene_BMK.10342;T1_Unigene_BMK.10343;T1_Unigene_BMK.11441;T1_Unigene_BMK.12870;T1_Unigene_BMK.12968;T1_Unigene_BMK.1358;T1_Unigene_BMK.13777;T1_Unigene_BMK.1380;T1_Unigene_BMK.14454;T1_Unigene_BMK.17061;T1_Unigene_BMK.17062;T1_Unigene_BMK.1904;T1_Unigene_BMK.19327;T1_Unigene_BMK.19712;T1_Unigene_BMK.22473;T1_Unigene_BMK.23135;T1_Unigene_BMK.24194;T1_Unigene_BMK.24756;T1_Unigene_BMK.25400;T1_…	K00981+K00981+K05857+K00889+K05857+K00889+K02183+K00889+K00901+K05857+K05857+K05857+K00888+K00889+K00981+K01110+K01110+K00999+K01107+K00889+K00889+K00913+K05857+K00889+K00889+K00981+K01107+K05857+K05857+K00914+K00921+K00913+K00889+K00889+K00921+K01107+K00889+K02183+K00888+K00889+K02183+K00889+K00889+K05857+K05857+K02183+K00981+K10047+K00889+K00889+K05857+K00889+K00889+K01092+K05857+K00889+K00901+…
Valine, leucine and isoleucine biosynthesis	ko00290	68	T1_Unigene_BMK.11907;T1_Unigene_BMK.13467;T1_Unigene_BMK.16509;T1_Unigene_BMK.18036;T1_Unigene_BMK.20215;T1_Unigene_BMK.2096;T1_Unigene_BMK.21290;T1_Unigene_BMK.21350;T1_Unigene_BMK.21537;T1_Unigene_BMK.21747;T1_Unigene_BMK.22271;T1_Unigene_BMK.23931;T1_Unigene_BMK.23932;T1_Unigene_BMK.24842;T1_Unigene_BMK.25609;T1_Unigene_BMK.26974;T1_Unigene_BMK.28099;T1_Unigene_BMK.29529;T1_Unigene_BMK.29649;T…	K01704+K00161+K00161+K01652+K00161+K01703+K01704+K01703+K00826+K01870+K01652+K00826+K00826+K00052+K00162+K00826+K00826+K00161+K00162+K00162+K00161+K01649+K01649+K01869+K00826+K01870+K01754+K01870+K01870+K00826+K00826+K00162+K00053+K01870+K00826+K01652+K01870+K00161+K01704+K00826+K00161+K01704+K01649+K00826+K00826+K01754+K00161+K00826+K01649+K01873+K01873+K00053+K01869+K01649+K01653+K01687+K01870+…
Glycerolipid metabolism	ko00561	68	T1_Unigene_BMK.10091;T1_Unigene_BMK.10119;T1_Unigene_BMK.11521;T1_Unigene_BMK.1165;T1_Unigene_BMK.12971;T1_Unigene_BMK.12974;T1_Unigene_BMK.13786;T1_Unigene_BMK.14454;T1_Unigene_BMK.14467;T1_Unigene_BMK.14597;T1_Unigene_BMK.16839;T1_Unigene_BMK.20775;T1_Unigene_BMK.23463;T1_Unigene_BMK.24845;T1_Unigene_BMK.25608;T1_Unigene_BMK.26084;T1_Unigene_BMK.26633;T1_Unigene_BMK.26722;T1_Unigene_BMK.28058;T…	K13508+K14085+K00864+K13508+K11155+K09480+K14674+K00901+K03715+K14085+K00630+K09480+K13513+K03715+K13513+K14085+K13523+K03715+K00128+K13508+K13508+K14674+K13508+K00011+K11155+K13523+K00630+K00128+K00128+K13508+K13508+K13508+K00863+K13508+K00128+K00011+K13508+K13508+K00128+K00128+K13508+K13508+K07407+K13508+K00655+K07407+K07407+K06118+K14085+K00128+K06119+K13508+K13508+K13513+K00901+K00864+K13508+…
Aminoacyl-tRNA biosynthesis	ko00970	68	T1_Unigene_BMK.11424;T1_Unigene_BMK.13966;T1_Unigene_BMK.15683;T1_Unigene_BMK.1569;T1_Unigene_BMK.16197;T1_Unigene_BMK.20741;T1_Unigene_BMK.21747;T1_Unigene_BMK.21929;T1_Unigene_BMK.22162;T1_Unigene_BMK.23599;T1_Unigene_BMK.23645;T1_Unigene_BMK.24460;T1_Unigene_BMK.24935;T1_Unigene_BMK.25037;T1_Unigene_BMK.25815;T1_Unigene_BMK.28517;T1_Unigene_BMK.29363;T1_Unigene_BMK.29559;T1_Unigene_BMK.2969;T1…	K04567+K01887+K01883+K01885+K01886+K01883+K01870+K01881+K01893+K01868+K01866+K04567+K01892+K01890+K01889+K01872+K01867+K01892+K01883+K01893+K01875+K14164+K01885+K01869+K01885+K01880+K01874+K01870+K04567+K01870+K01870+K01881+K01889+K01875+K01883+K01880+K01870+K01870+K01876+K00604+K01893+K02434+K01890+K01883+K01893+K01887+K01866+K04567+K01867+K01876+K01881+K01873+K01873+K01890+K01890+K01869+K01875+…
Stilbenoid, diarylheptanoid and gingerol biosynthesis	ko00945	66	T1_Unigene_BMK.1137;T1_Unigene_BMK.12758;T1_Unigene_BMK.16282;T1_Unigene_BMK.16283;T1_Unigene_BMK.16284;T1_Unigene_BMK.17979;T1_Unigene_BMK.18197;T1_Unigene_BMK.18198;T1_Unigene_BMK.19095;T1_Unigene_BMK.20163;T1_Unigene_BMK.20164;T1_Unigene_BMK.20165;T1_Unigene_BMK.20271;T1_Unigene_BMK.20272;T1_Unigene_BMK.21671;T1_Unigene_BMK.21821;T1_Unigene_BMK.22475;T1_Unigene_BMK.24373;T1_Unigene_BMK.25222;T…	K00517+K00517+K00517+K00517+K00517+K00517+K00517+K00517+K00517+K00517+K00517+K00517+K00517+K00517+K00517+K00517+K00517+K00517+K00517+K00517+K00588+K00517+K00517+K00517+K00517+K00517+K00517+K00517+K09754+K00487+K00517+K00517+K00517+K00517+K00487+K00517+K00517+K00517+K00517+K00517+K00517+K00517+K00517+K00517+K00517+K00517+K00588+K13065+K00517+K00517+K00517+K00517+K00588+K00517+K00517+K00517+K00517+…
Photosynthesis	ko00195	63	T1_Unigene_BMK.10005;T1_Unigene_BMK.14893;T1_Unigene_BMK.16567;T1_Unigene_BMK.16568;T1_Unigene_BMK.16595;T1_Unigene_BMK.17113;T1_Unigene_BMK.17417;T1_Unigene_BMK.17833;T1_Unigene_BMK.19349;T1_Unigene_BMK.19398;T1_Unigene_BMK.19730;T1_Unigene_BMK.19795;T1_Unigene_BMK.21149;T1_Unigene_BMK.21790;T1_Unigene_BMK.21975;T1_Unigene_BMK.22251;T1_Unigene_BMK.22944;T1_Unigene_BMK.23790;T1_Unigene_BMK.23937;…	K03689+K02694+K02717+K02717+K02721+K02638+K02698+K02704+K02716+K02113+K02694+K02695+K02641+K02641+K02717+K02639+K08903+K02636+K02639+K08905+K03542+K02109+K02705+K02717+K02699+K02699+K02111+K08901+K03541+K02639+K02723+K08901+K02698+K08901+K08901+K02639+K08901+K08902+K08903+K03541+K02639+K02113+K02109+K02641+K08905+K02634+K02692+K02695+K02695+K02717+K02641+K02115+K02115+K03542+K02112+K02721+K02711+…
Protein export	ko03060	61	T1_Unigene_BMK.11176;T1_Unigene_BMK.12386;T1_Unigene_BMK.12387;T1_Unigene_BMK.12498;T1_Unigene_BMK.13206;T1_Unigene_BMK.15543;T1_Unigene_BMK.15876;T1_Unigene_BMK.17836;T1_Unigene_BMK.18323;T1_Unigene_BMK.20394;T1_Unigene_BMK.21686;T1_Unigene_BMK.21718;T1_Unigene_BMK.22344;T1_Unigene_BMK.22669;T1_Unigene_BMK.23755;T1_Unigene_BMK.24218;T1_Unigene_BMK.24780;T1_Unigene_BMK.25622;T1_Unigene_BMK.25705;…	K03106+K03100+K03100+K10956+K12947+K09648+K03106+K03110+K07342+K09647+K09481+K03106+K03118+K10956+K12947+K12272+K13280+K09490+K03108+K03100+K03116+K03105+K03217+K03116+K03217+K03217+K03070+K13431+K09490+K03107+K12275+K09540+K10956+K03070+K03106+K07342+K09481+K09490+K03109+K13280+K10956+K10956+K13431+K13280+K13280+K07342+K09490+K09647+K12946+K13280+K03100+K09490+K03217+K03106+K10956+K03107+K12275+…
SNARE interactions in vesicular transport	ko04130	61	T1_Unigene_BMK.11926;T1_Unigene_BMK.12194;T1_Unigene_BMK.12555;T1_Unigene_BMK.12769;T1_Unigene_BMK.14276;T1_Unigene_BMK.14835;T1_Unigene_BMK.16876;T1_Unigene_BMK.17893;T1_Unigene_BMK.17894;T1_Unigene_BMK.18412;T1_Unigene_BMK.19742;T1_Unigene_BMK.23949;T1_Unigene_BMK.24389;T1_Unigene_BMK.24455;T1_Unigene_BMK.24525;T1_Unigene_BMK.24865;T1_Unigene_BMK.25003;T1_Unigene_BMK.25061;T1_Unigene_BMK.25565;…	K08516+K08497+K08493+K08503+K08515+K08497+K08515+K08486+K08486+K08504+K08488+K08515+K08490+K08486+K08515+K08486+K08489+K08489+K08488+K08486+K08493+K08504+K08496+K08509+K08492+K08506+K08495+K08495+K08493+K08509+K08509+K04560+K08516+K08486+K08495+K08490+K08505+K08504+K08517+K08486+K08506+K08496+K08488+K08505+K08515+K08489+K08496+K08496+K08515+K08493+K08517+K08490+K08504+K08516+K08506+K08486+K08498+…
Porphyrin and chlorophyll metabolism	ko00860	59	T1_Unigene_BMK.10394;T1_Unigene_BMK.10417;T1_Unigene_BMK.11661;T1_Unigene_BMK.1569;T1_Unigene_BMK.18992;T1_Unigene_BMK.19355;T1_Unigene_BMK.20756;T1_Unigene_BMK.20955;T1_Unigene_BMK.22295;T1_Unigene_BMK.23182;T1_Unigene_BMK.24237;T1_Unigene_BMK.25894;T1_Unigene_BMK.26064;T1_Unigene_BMK.27629;T1_Unigene_BMK.27770;T1_Unigene_BMK.28923;T1_Unigene_BMK.29305;T1_Unigene_BMK.30047;T1_Unigene_BMK.30646;T…	K13606+K10960+K00522+K01885+K03405+K00522+K02492+K04040+K00522+K00522+K00228+K13606+K04035+K03405+K00218+K01772+K02495+K03428+K02492+K10960+K01885+K01698+K02259+K01749+K01885+K00522+K01772+K00218+K00699+K01772+K13071+K13544+K02259+K01772+K02257+K10960+K00522+K00228+K00228+K03405+K03405+K08099+K03404+K00218+K00218+K03405+K00218+K00231+K13545+K01845+K02495+K13600+K02257+K00231+K02492+K03403+K02259+…
Galactose metabolism	ko00052	58	T1_Unigene_BMK.10197;T1_Unigene_BMK.11144;T1_Unigene_BMK.12036;T1_Unigene_BMK.1403;T1_Unigene_BMK.15038;T1_Unigene_BMK.18191;T1_Unigene_BMK.19164;T1_Unigene_BMK.19165;T1_Unigene_BMK.21755;T1_Unigene_BMK.22713;T1_Unigene_BMK.23245;T1_Unigene_BMK.23866;T1_Unigene_BMK.24280;T1_Unigene_BMK.25009;T1_Unigene_BMK.25873;T1_Unigene_BMK.25967;T1_Unigene_BMK.27368;T1_Unigene_BMK.28237;T1_Unigene_BMK.28691;T…	K00963+K01187+K01187+K00963+K01835+K01193+K01193+K01193+K00850+K00850+K00844+K00850+K00849+K00963+K01784+K00850+K01784+K01784+K00844+K01193+K00011+K00850+K01187+K12309+K01193+K00844+K01187+K00849+K01187+K00011+K00963+K01835+K01193+K01193+K01193+K00850+K07407+K00844+K00844+K01190+K00844+K00965+K00844+K00844+K07407+K07407+K00844+K01784+K01835+K00849+K01193+K01835+K00844+K00850+K01190+K00844+K00844+…
Glyoxylate and dicarboxylate metabolism	ko00630	57	T1_Unigene_BMK.11652;T1_Unigene_BMK.16335;T1_Unigene_BMK.16679;T1_Unigene_BMK.16680;T1_Unigene_BMK.18652;T1_Unigene_BMK.18653;T1_Unigene_BMK.1913;T1_Unigene_BMK.21661;T1_Unigene_BMK.23690;T1_Unigene_BMK.23691;T1_Unigene_BMK.23692;T1_Unigene_BMK.23693;T1_Unigene_BMK.24406;T1_Unigene_BMK.24812;T1_Unigene_BMK.25555;T1_Unigene_BMK.28414;T1_Unigene_BMK.28496;T1_Unigene_BMK.28809;T1_Unigene_BMK.28861;T…	K00626+K11517+K11517+K11517+K01647+K01647+K01647+K00026+K01681+K01681+K01681+K01681+K01647+K01602+K11517+K00025+K00026+K01681+K01647+K00026+K00026+K01681+K00626+K01681+K01647+K01681+K00025+K01681+K01816+K01647+K00026+K01681+K01647+K01681+K01681+K01647+K01647+K01647+K01647+K00026+K00122+K11517+K01602+K01602+K11517+K01455+K00025+K01433+K01647+K01681+K01601+K01647+K01647+K01647+K01602+K01681+K01647
Ascorbate and aldarate metabolism	ko00053	56	T1_Unigene_BMK.10011;T1_Unigene_BMK.10119;T1_Unigene_BMK.12284;T1_Unigene_BMK.13455;T1_Unigene_BMK.14597;T1_Unigene_BMK.14698;T1_Unigene_BMK.18676;T1_Unigene_BMK.19122;T1_Unigene_BMK.19152;T1_Unigene_BMK.19154;T1_Unigene_BMK.23004;T1_Unigene_BMK.26084;T1_Unigene_BMK.27888;T1_Unigene_BMK.28022;T1_Unigene_BMK.28058;T1_Unigene_BMK.30004;T1_Unigene_BMK.30227;T1_Unigene_BMK.3114;T1_Unigene_BMK.32524;T…	K00469+K14085+K14190+K00469+K14085+K00423+K00469+K08232+K14190+K14190+K00434+K14085+K00434+K00064+K00128+K00225+K10046+K14190+K00128+K00012+K00469+K14190+K00128+K00699+K00469+K00423+K00128+K08232+K10047+K08232+K00128+K00128+K14190+K00434+K00469+K00434+K00434+K00469+K08232+K08232+K14085+K00128+K00434+K00012+K08232+K00434+K00128+K00128+K14190+K00423+K10046+K00434+K00012+K00434+K00434+K00128
alpha-Linolenic acid metabolism	ko00592	56	T1_Unigene_BMK.10305;T1_Unigene_BMK.10927;T1_Unigene_BMK.11098;T1_Unigene_BMK.11945;T1_Unigene_BMK.13453;T1_Unigene_BMK.13786;T1_Unigene_BMK.13866;T1_Unigene_BMK.14010;T1_Unigene_BMK.1489;T1_Unigene_BMK.16277;T1_Unigene_BMK.16464;T1_Unigene_BMK.16465;T1_Unigene_BMK.17531;T1_Unigene_BMK.17532;T1_Unigene_BMK.17533;T1_Unigene_BMK.17534;T1_Unigene_BMK.17550;T1_Unigene_BMK.18294;T1_Unigene_BMK.21940;T…	K00232+K05894+K00454+K00454+K00232+K14674+K00454+K00232+K00454+K05894+K00232+K00232+K00232+K00232+K00232+K00232+K01723+K01058+K10527+K10525+K00454+K10525+K10526+K00232+K14674+K00454+K00454+K05894+K00454+K00232+K00232+K00232+K00454+K00232+K00232+K00454+K00454+K00454+K10525+K01723+K00454+K08241+K10525+K10525+K10525+K00232+K00232+K14674+K00454+K00454+K10527+K05894+K00454+K10527+K05894+K00232
Steroid biosynthesis	ko00100	55	T1_Unigene_BMK.10696;T1_Unigene_BMK.11215;T1_Unigene_BMK.12801;T1_Unigene_BMK.13786;T1_Unigene_BMK.18793;T1_Unigene_BMK.18794;T1_Unigene_BMK.1971;T1_Unigene_BMK.21256;T1_Unigene_BMK.22183;T1_Unigene_BMK.24419;T1_Unigene_BMK.25156;T1_Unigene_BMK.25638;T1_Unigene_BMK.25913;T1_Unigene_BMK.26035;T1_Unigene_BMK.26600;T1_Unigene_BMK.2764;T1_Unigene_BMK.28966;T1_Unigene_BMK.29602;T1_Unigene_BMK.29816;T1…	K09832+K09832+K08242+K14674+K08242+K08242+K00227+K09828+K00559+K00511+K09832+K08246+K14423+K14424+K00511+K00801+K14674+K14423+K05917+K00511+K00511+K00801+K00227+K09832+K00801+K08242+K00511+K00559+K01824+K08246+K00227+K14423+K14423+K14423+K14423+K00511+K01853+K00511+K00511+K00222+K14674+K05917+K00801+K00801+K00213+K05917+K14423+K00801+K00511+K14424+K00511+K00227+K00511+K14424+K14423
DNA replication	ko03030	55	T1_Unigene_BMK.10627;T1_Unigene_BMK.15551;T1_Unigene_BMK.16582;T1_Unigene_BMK.16636;T1_Unigene_BMK.18515;T1_Unigene_BMK.18645;T1_Unigene_BMK.18764;T1_Unigene_BMK.21367;T1_Unigene_BMK.21461;T1_Unigene_BMK.21722;T1_Unigene_BMK.21899;T1_Unigene_BMK.22761;T1_Unigene_BMK.23516;T1_Unigene_BMK.23718;T1_Unigene_BMK.23872;T1_Unigene_BMK.24310;T1_Unigene_BMK.26021;T1_Unigene_BMK.26316;T1_Unigene_BMK.28073;…	K07466+K02685+K02321+K07466+K10747+K07466+K07466+K02320+K02212+K03111+K02325+K07466+K07466+K02209+K10745+K07466+K02540+K02328+K07466+K10747+K10739+K10754+K02210+K02327+K02542+K10742+K02324+K10756+K02325+K04802+K07466+K07466+K02325+K10743+K10739+K10755+K07466+K04802+K03111+K10755+K07466+K02541+K07466+K07466+K10756+K03504+K10739+K10744+K02335+K10742+K10742+K04799+K02684+K07466+K10755
Basal transcription factors	ko03022	53	T1_Unigene_BMK.10270;T1_Unigene_BMK.1128;T1_Unigene_BMK.11691;T1_Unigene_BMK.15146;T1_Unigene_BMK.16913;T1_Unigene_BMK.18507;T1_Unigene_BMK.19449;T1_Unigene_BMK.20572;T1_Unigene_BMK.20907;T1_Unigene_BMK.211;T1_Unigene_BMK.22940;T1_Unigene_BMK.23153;T1_Unigene_BMK.23292;T1_Unigene_BMK.25367;T1_Unigene_BMK.25382;T1_Unigene_BMK.26330;T1_Unigene_BMK.27326;T1_Unigene_BMK.28051;T1_Unigene_BMK.28241;T1_…	K02202+K10842+K02202+K03122+K03139+K03139+K03123+K14535+K03143+K02202+K03135+K02202+K03137+K03132+K03131+K10842+K10844+K06634+K03125+K03130+K03120+K03136+K03122+K03141+K03126+K03138+K03131+K02202+K02202+K02202+K02202+K02202+K03136+K03134+K10845+K03139+K03139+K03123+K03133+K03135+K03124+K03138+K03127+K03132+K03136+K03124+K03131+K03142+K03128+K03144+K03141+K03124+K14535
Mismatch repair	ko03430	53	T1_Unigene_BMK.10308;T1_Unigene_BMK.10309;T1_Unigene_BMK.10627;T1_Unigene_BMK.1114;T1_Unigene_BMK.1115;T1_Unigene_BMK.12648;T1_Unigene_BMK.13379;T1_Unigene_BMK.13380;T1_Unigene_BMK.13719;T1_Unigene_BMK.14629;T1_Unigene_BMK.16636;T1_Unigene_BMK.18393;T1_Unigene_BMK.18515;T1_Unigene_BMK.18645;T1_Unigene_BMK.18764;T1_Unigene_BMK.21722;T1_Unigene_BMK.22761;T1_Unigene_BMK.23516;T1_Unigene_BMK.24310;T1…	K08736+K08736+K07466+K08739+K08739+K08739+K08736+K08736+K10746+K07456+K07466+K10858+K10747+K07466+K07466+K03111+K07466+K07466+K07466+K08735+K02328+K07466+K10747+K10739+K10754+K02327+K10756+K07456+K10858+K10858+K10858+K04802+K07466+K07466+K10739+K10755+K07466+K04802+K03111+K10755+K07466+K08737+K07456+K07466+K07466+K10756+K03504+K10739+K08739+K08734+K07466+K10746+K10755
Homologous recombination	ko03440	53	T1_Unigene_BMK.10627;T1_Unigene_BMK.1117;T1_Unigene_BMK.16636;T1_Unigene_BMK.17800;T1_Unigene_BMK.18645;T1_Unigene_BMK.18764;T1_Unigene_BMK.19463;T1_Unigene_BMK.19464;T1_Unigene_BMK.21346;T1_Unigene_BMK.21347;T1_Unigene_BMK.21722;T1_Unigene_BMK.22290;T1_Unigene_BMK.22291;T1_Unigene_BMK.22292;T1_Unigene_BMK.22761;T1_Unigene_BMK.23516;T1_Unigene_BMK.24310;T1_Unigene_BMK.26316;T1_Unigene_BMK.26570;T…	K07466+K10880+K07466+K10879+K07466+K07466+K10869+K10869+K10865+K10865+K03111+K10875+K10875+K10875+K07466+K07466+K07466+K02328+K03165+K03553+K07466+K04482+K03655+K10739+K03553+K10881+K02327+K10866+K10901+K08775+K10880+K10875+K10879+K07466+K07466+K10739+K03165+K03165+K07466+K03111+K07466+K04482+K10901+K07466+K07466+K08991+K03504+K10739+K03553+K02335+K03165+K07466+K10869
Terpenoid backbone biosynthesis	ko00900	51	T1_Unigene_BMK.10275;T1_Unigene_BMK.10417;T1_Unigene_BMK.10423;T1_Unigene_BMK.10424;T1_Unigene_BMK.11652;T1_Unigene_BMK.12455;T1_Unigene_BMK.12463;T1_Unigene_BMK.12464;T1_Unigene_BMK.14376;T1_Unigene_BMK.15119;T1_Unigene_BMK.15613;T1_Unigene_BMK.17591;T1_Unigene_BMK.19496;T1_Unigene_BMK.22109;T1_Unigene_BMK.23070;T1_Unigene_BMK.23208;T1_Unigene_BMK.23962;T1_Unigene_BMK.25567;T1_Unigene_BMK.25616;…	K13789+K10960+K11778+K11778+K00626+K11778+K00787+K00787+K01770+K13789+K00021+K00869+K00787+K01597+K00991+K11778+K11778+K01770+K14066+K00919+K13789+K00099+K11778+K05356+K10960+K00626+K03526+K01823+K00021+K01823+K10960+K11778+K00021+K01823+K01823+K03527+K01770+K00787+K01597+K00938+K01662+K01823+K13789+K00021+K01641+K01662+K00021+K00021+K00938+K00021+K13789
Biosynthesis of unsaturated fatty acids	ko01040	50	T1_Unigene_BMK.10305;T1_Unigene_BMK.13453;T1_Unigene_BMK.13959;T1_Unigene_BMK.14010;T1_Unigene_BMK.1487;T1_Unigene_BMK.15415;T1_Unigene_BMK.1601;T1_Unigene_BMK.16464;T1_Unigene_BMK.16465;T1_Unigene_BMK.17531;T1_Unigene_BMK.17532;T1_Unigene_BMK.17533;T1_Unigene_BMK.17534;T1_Unigene_BMK.17846;T1_Unigene_BMK.17890;T1_Unigene_BMK.24256;T1_Unigene_BMK.27553;T1_Unigene_BMK.28097;T1_Unigene_BMK.28932;T1…	K00232+K00232+K03921+K00232+K10258+K00059+K00507+K00232+K00232+K00232+K00232+K00232+K00232+K03921+K10258+K01068+K00232+K03921+K10257+K00507+K07513+K10257+K00232+K00232+K03921+K10256+K00232+K10256+K00232+K00059+K03921+K00232+K00507+K00059+K03921+K10256+K01076+K01076+K07513+K00059+K03921+K03921+K00507+K00232+K00232+K10257+K10255+K10256+K07513+K00232
beta-Alanine metabolism	ko00410	49	T1_Unigene_BMK.10119;T1_Unigene_BMK.12495;T1_Unigene_BMK.14597;T1_Unigene_BMK.17619;T1_Unigene_BMK.1811;T1_Unigene_BMK.18452;T1_Unigene_BMK.19046;T1_Unigene_BMK.19458;T1_Unigene_BMK.22516;T1_Unigene_BMK.23704;T1_Unigene_BMK.24084;T1_Unigene_BMK.26084;T1_Unigene_BMK.26274;T1_Unigene_BMK.27945;T1_Unigene_BMK.28058;T1_Unigene_BMK.28433;T1_Unigene_BMK.28850;T1_Unigene_BMK.32524;T1_Unigene_BMK.34243;T…	K14085+K00276+K14085+K01692+K00207+K00797+K01580+K01918+K00797+K00797+K05605+K14085+K00207+K00276+K00128+K00249+K05605+K00128+K00249+K00128+K00207+K07511+K00128+K00249+K00249+K00797+K00128+K00128+K01580+K13524+K01580+K05605+K01464+K01464+K00797+K00797+K01580+K14085+K00249+K00128+K01580+K00128+K00128+K00249+K01578+K01580+K01580+K00128+K00276
Cyanoamino acid metabolism	ko00460	49	T1_Unigene_BMK.10252;T1_Unigene_BMK.12335;T1_Unigene_BMK.1598;T1_Unigene_BMK.1599;T1_Unigene_BMK.16791;T1_Unigene_BMK.19104;T1_Unigene_BMK.19105;T1_Unigene_BMK.23840;T1_Unigene_BMK.26215;T1_Unigene_BMK.27134;T1_Unigene_BMK.27877;T1_Unigene_BMK.27966;T1_Unigene_BMK.28247;T1_Unigene_BMK.28248;T1_Unigene_BMK.28669;T1_Unigene_BMK.29276;T1_Unigene_BMK.29412;T1_Unigene_BMK.29829;T1_Unigene_BMK.30422;T1…	K00600+K05350+K00600+K00600+K01188+K00681+K00681+K01188+K05350+K08248+K00600+K01188+K08249+K08249+K00600+K00681+K00681+K01188+K05349+K00600+K05350+K01188+K01188+K08248+K00681+K00681+K00681+K00681+K01501+K13034+K00600+K13035+K01188+K01188+K00600+K05350+K05350+K05350+K00600+K01188+K00600+K00600+K01188+K01501+K01188+K01188+K01188+K01501+K00600
Propanoate metabolism	ko00640	49	T1_Unigene_BMK.10119;T1_Unigene_BMK.11652;T1_Unigene_BMK.13860;T1_Unigene_BMK.14279;T1_Unigene_BMK.14597;T1_Unigene_BMK.17619;T1_Unigene_BMK.18780;T1_Unigene_BMK.2138;T1_Unigene_BMK.24084;T1_Unigene_BMK.26084;T1_Unigene_BMK.28058;T1_Unigene_BMK.28433;T1_Unigene_BMK.28850;T1_Unigene_BMK.29357;T1_Unigene_BMK.31242;T1_Unigene_BMK.32524;T1_Unigene_BMK.34243;T1_Unigene_BMK.34549;T1_Unigene_BMK.36256;T…	K14085+K00626+K00140+K00016+K14085+K01692+K00140+K00224+K05605+K14085+K00128+K00249+K05605+K02160+K00626+K00128+K00249+K00128+K00224+K01961+K00224+K07511+K00128+K00249+K00249+K01899+K00128+K00128+K13524+K05605+K00224+K14085+K01899+K00249+K00128+K01895+K01900+K00128+K00128+K00249+K01578+K01962+K02160+K11262+K11262+K11262+K01899+K00128+K11262
Base excision repair	ko03410	49	T1_Unigene_BMK.10880;T1_Unigene_BMK.12936;T1_Unigene_BMK.15921;T1_Unigene_BMK.16374;T1_Unigene_BMK.16662;T1_Unigene_BMK.17808;T1_Unigene_BMK.18123;T1_Unigene_BMK.18515;T1_Unigene_BMK.19047;T1_Unigene_BMK.20927;T1_Unigene_BMK.21899;T1_Unigene_BMK.22316;T1_Unigene_BMK.22470;T1_Unigene_BMK.22471;T1_Unigene_BMK.24577;T1_Unigene_BMK.2519;T1_Unigene_BMK.25965;T1_Unigene_BMK.26316;T1_Unigene_BMK.26677;T…	K03575+K01246+K03512+K10773+K01246+K01142+K03648+K10747+K01246+K01247+K02325+K01246+K01247+K01247+K10803+K01246+K03652+K02328+K10798+K01246+K10802+K10747+K01246+K10772+K10801+K02327+K01246+K02324+K01246+K03575+K02325+K04802+K02325+K10773+K04802+K10569+K10569+K01247+K01246+K01247+K01247+K03660+K03504+K01247+K02335+K04799+K10798+K01246+K03652
Phenylalanine, tyrosine and tryptophan biosynthesis	ko00400	47	T1_Unigene_BMK.18279;T1_Unigene_BMK.18502;T1_Unigene_BMK.21799;T1_Unigene_BMK.22286;T1_Unigene_BMK.22288;T1_Unigene_BMK.24563;T1_Unigene_BMK.24565;T1_Unigene_BMK.25539;T1_Unigene_BMK.25545;T1_Unigene_BMK.26034;T1_Unigene_BMK.27857;T1_Unigene_BMK.28017;T1_Unigene_BMK.28349;T1_Unigene_BMK.28474;T1_Unigene_BMK.28821;T1_Unigene_BMK.29530;T1_Unigene_BMK.29547;T1_Unigene_BMK.30498;T1_Unigene_BMK.30967;…	K01626+K01850+K00766+K00815+K00815+K01696+K01696+K01817+K01696+K01609+K01696+K01850+K00813+K00800+K00817+K00815+K01736+K13832+K01626+K01850+K01657+K14455+K01735+K01626+K14455+K14455+K14454+K14454+K00813+K01626+K00815+K01609+K01695+K00813+K01696+K00891+K06001+K01695+K00766+K00800+K01657+K00891+K01626+K01626+K01658+K01657+K01609
Circadian rhythm - plant	ko04712	47	T1_Unigene_BMK.13361;T1_Unigene_BMK.15356;T1_Unigene_BMK.19926;T1_Unigene_BMK.22709;T1_Unigene_BMK.22710;T1_Unigene_BMK.23983;T1_Unigene_BMK.26319;T1_Unigene_BMK.26477;T1_Unigene_BMK.26714;T1_Unigene_BMK.26950;T1_Unigene_BMK.27138;T1_Unigene_BMK.27139;T1_Unigene_BMK.27242;T1_Unigene_BMK.27618;T1_Unigene_BMK.28820;T1_Unigene_BMK.29997;T1_Unigene_BMK.30479;T1_Unigene_BMK.30551;T1_Unigene_BMK.31423;…	K12126+K12123+K03097+K03097+K03097+K12129+K12128+K12125+K12117+K12123+K12119+K12119+K12122+K12130+K12118+K12126+K12124+K12119+K12133+K00660+K12127+K03115+K12123+K12123+K12126+K03097+K12118+K12130+K12118+K00660+K00660+K12125+K03097+K12134+K12128+K03115+K03115+K12132+K12131+K12130+K12133+K12130+K12120+K12116+K03097+K03097+K12126
Sulfur metabolism	ko00920	46	T1_Unigene_BMK.15338;T1_Unigene_BMK.16990;T1_Unigene_BMK.17091;T1_Unigene_BMK.18300;T1_Unigene_BMK.18636;T1_Unigene_BMK.20276;T1_Unigene_BMK.21451;T1_Unigene_BMK.21660;T1_Unigene_BMK.22275;T1_Unigene_BMK.24556;T1_Unigene_BMK.25241;T1_Unigene_BMK.25400;T1_Unigene_BMK.26871;T1_Unigene_BMK.28091;T1_Unigene_BMK.28316;T1_Unigene_BMK.28472;T1_Unigene_BMK.29284;T1_Unigene_BMK.30072;T1_Unigene_BMK.31575;…	K01739+K01738+K01738+K00860+K00860+K00640+K01738+K01738+K00860+K13811+K01082+K01107+K01738+K01760+K00860+K01107+K01739+K01738+K01107+K13811+K00387+K13811+K00860+K01738+K00860+K00860+K01739+K01739+K01738+K01738+K00392+K01738+K13811+K13811+K00640+K13034+K01082+K00640+K13811+K00860+K01738+K00640+K00392+K00392+K01738+K01738
N-Glycan biosynthesis	ko00510	45	T1_Unigene_BMK.13746;T1_Unigene_BMK.16300;T1_Unigene_BMK.17589;T1_Unigene_BMK.21687;T1_Unigene_BMK.24108;T1_Unigene_BMK.24363;T1_Unigene_BMK.24462;T1_Unigene_BMK.24974;T1_Unigene_BMK.26161;T1_Unigene_BMK.26859;T1_Unigene_BMK.26875;T1_Unigene_BMK.27063;T1_Unigene_BMK.27894;T1_Unigene_BMK.28392;T1_Unigene_BMK.28684;T1_Unigene_BMK.29311;T1_Unigene_BMK.29905;T1_Unigene_BMK.30275;T1_Unigene_BMK.30700;…	K03845+K00737+K07151+K01230+K00737+K03848+K12668+K09659+K00736+K03849+K07252+K00729+K03850+K06316+K03847+K00721+K07151+K00737+K03844+K05546+K01230+K03842+K05546+K01231+K00737+K01230+K12667+K03846+K00737+K01230+K03849+K12670+K07252+K00902+K01228+K00721+K07432+K01230+K03846+K03844+K01231+K03843+K01228+K01228+K01228
Butanoate metabolism	ko00650	41	T1_Unigene_BMK.11205;T1_Unigene_BMK.11652;T1_Unigene_BMK.13467;T1_Unigene_BMK.16509;T1_Unigene_BMK.17619;T1_Unigene_BMK.18036;T1_Unigene_BMK.19015;T1_Unigene_BMK.19046;T1_Unigene_BMK.20215;T1_Unigene_BMK.22271;T1_Unigene_BMK.25609;T1_Unigene_BMK.29529;T1_Unigene_BMK.29649;T1_Unigene_BMK.31242;T1_Unigene_BMK.31509;T1_Unigene_BMK.31513;T1_Unigene_BMK.6599;T1_Unigene_BMK.9869;T2_Unigene_BMK.14293;T2…	K00135+K00626+K00161+K00161+K01692+K01652+K00074+K01580+K00161+K01652+K00162+K00161+K00162+K00626+K00162+K00161+K07511+K00162+K01580+K01652+K13524+K01580+K00161+K01640+K00161+K00135+K00135+K01580+K01580+K00161+K01641+K01653+K01580+K01580+K01652+K01653+K01652+K00161+K00161+K00161+K00161
Pantothenate and CoA biosynthesis	ko00770	41	T1_Unigene_BMK.16334;T1_Unigene_BMK.17847;T1_Unigene_BMK.18036;T1_Unigene_BMK.1811;T1_Unigene_BMK.19458;T1_Unigene_BMK.21537;T1_Unigene_BMK.22271;T1_Unigene_BMK.23931;T1_Unigene_BMK.23932;T1_Unigene_BMK.25964;T1_Unigene_BMK.26274;T1_Unigene_BMK.26974;T1_Unigene_BMK.28099;T1_Unigene_BMK.29202;T1_Unigene_BMK.29865;T1_Unigene_BMK.33208;T1_Unigene_BMK.35602;T1_Unigene_BMK.35745;T1_Unigene_BMK.8165;T1…	K01598+K00859+K01652+K00207+K01918+K00826+K01652+K00826+K00826+K00606+K00207+K00826+K00826+K01922+K09680+K00826+K00207+K09680+K00826+K00826+K00053+K00826+K01652+K01598+K01464+K00606+K00606+K00826+K01464+K01598+K00859+K00826+K00826+K00826+K00053+K01653+K01687+K01652+K01653+K01652+K01598
Carotenoid biosynthesis	ko00906	41	T1_Unigene_BMK.10610;T1_Unigene_BMK.12010;T1_Unigene_BMK.12979;T1_Unigene_BMK.1372;T1_Unigene_BMK.22406;T1_Unigene_BMK.22563;T1_Unigene_BMK.23372;T1_Unigene_BMK.23373;T1_Unigene_BMK.23374;T1_Unigene_BMK.25208;T1_Unigene_BMK.26401;T1_Unigene_BMK.26886;T1_Unigene_BMK.27644;T1_Unigene_BMK.29520;T1_Unigene_BMK.29552;T1_Unigene_BMK.30835;T1_Unigene_BMK.31454;T1_Unigene_BMK.32432;T1_Unigene_BMK.32684;T…	K09840+K09843+K09843+K02294+K09843+K09840+K09842+K09842+K09842+K09837+K06444+K09843+K02294+K09840+K02291+K09835+K09839+K02293+K14606+K09840+K06443+K09843+K09838+K09840+K09838+K09840+K02293+K09840+K09841+K02294+K09843+K09843+K09843+K02291+K00514+K06443+K02293+K02294+K09840+K09840+K09840
Tyrosine metabolism	ko00350	38	T1_Unigene_BMK.11205;T1_Unigene_BMK.11528;T1_Unigene_BMK.12495;T1_Unigene_BMK.13835;T1_Unigene_BMK.17826;T1_Unigene_BMK.20473;T1_Unigene_BMK.22286;T1_Unigene_BMK.22288;T1_Unigene_BMK.23573;T1_Unigene_BMK.23988;T1_Unigene_BMK.24155;T1_Unigene_BMK.25642;T1_Unigene_BMK.27945;T1_Unigene_BMK.28349;T1_Unigene_BMK.28733;T1_Unigene_BMK.28821;T1_Unigene_BMK.29530;T1_Unigene_BMK.29646;T1_Unigene_BMK.34410;…	K00135+K13951+K00276+K00121+K00001+K00457+K00815+K00815+K00451+K00001+K01592+K00121+K00276+K00813+K01555+K00817+K00815+K00121+K14455+K00451+K00121+K14455+K14455+K14454+K14454+K00813+K00815+K01592+K00813+K00121+K00001+K00135+K00135+K00599+K00457+K00001+K13953+K00276
Fatty acid biosynthesis	ko00061	37	T1_Unigene_BMK.12415;T1_Unigene_BMK.13757;T1_Unigene_BMK.13959;T1_Unigene_BMK.15415;T1_Unigene_BMK.16454;T1_Unigene_BMK.17846;T1_Unigene_BMK.19909;T1_Unigene_BMK.28097;T1_Unigene_BMK.28798;T1_Unigene_BMK.29357;T1_Unigene_BMK.32351;T1_Unigene_BMK.33363;T1_Unigene_BMK.34362;T1_Unigene_BMK.35241;T1_Unigene_BMK.5108;T1_Unigene_BMK.7696;T1_Unigene_BMK.8354;T1_Unigene_BMK.8355;T2_Unigene_BMK.10276;T2_U…	K00665+K02372+K03921+K00059+K02372+K03921+K10782+K03921+K10781+K02160+K09458+K09458+K10781+K03921+K01961+K00059+K00648+K00648+K03921+K10782+K10782+K00059+K03921+K00645+K00059+K03921+K03921+K10782+K00648+K09458+K01962+K02160+K11262+K11262+K11262+K11262+K00208
Selenocompound metabolism	ko00450	36	T1_Unigene_BMK.15338;T1_Unigene_BMK.17897;T1_Unigene_BMK.17898;T1_Unigene_BMK.18240;T1_Unigene_BMK.18810;T1_Unigene_BMK.21817;T1_Unigene_BMK.22649;T1_Unigene_BMK.24476;T1_Unigene_BMK.24478;T1_Unigene_BMK.24556;T1_Unigene_BMK.28091;T1_Unigene_BMK.29284;T1_Unigene_BMK.29909;T1_Unigene_BMK.30237;T1_Unigene_BMK.32199;T1_Unigene_BMK.33062;T1_Unigene_BMK.33185;T1_Unigene_BMK.34216;T1_Unigene_BMK.34904;…	K01739+K00384+K00384+K01761+K00549+K00384+K00549+K00549+K00549+K13811+K01760+K01739+K00549+K11717+K13811+K13811+K01874+K01758+K00816+K01758+K01008+K01739+K01739+K08247+K13811+K13811+K00384+K00549+K00549+K13811+K00549+K00549+K00384+K11717+K00384+K01874
RNA polymerase	ko03020	36	T1_Unigene_BMK.11745;T1_Unigene_BMK.1254;T1_Unigene_BMK.16138;T1_Unigene_BMK.16916;T1_Unigene_BMK.17475;T1_Unigene_BMK.17815;T1_Unigene_BMK.22115;T1_Unigene_BMK.22428;T1_Unigene_BMK.22429;T1_Unigene_BMK.24214;T1_Unigene_BMK.27557;T1_Unigene_BMK.27847;T1_Unigene_BMK.28383;T1_Unigene_BMK.28853;T1_Unigene_BMK.30169;T1_Unigene_BMK.30718;T1_Unigene_BMK.30948;T1_Unigene_BMK.32852;T1_Unigene_BMK.3573;T1…	K03011+K03042+K14721+K03015+K03025+K03024+K03023+K03026+K03026+K03013+K03017+K03000+K02999+K03002+K03020+K03018+K03093+K03093+K03006+K03009+K03008+K03008+K03012+K03009+K03005+K03020+K03006+K03017+K03024+K03023+K03043+K14721+K03021+K03002+K03013+K03010
Ubiquinone and other terpenoid-quinone biosynthesis	ko00130	34	T1_Unigene_BMK.15258;T1_Unigene_BMK.17235;T1_Unigene_BMK.20473;T1_Unigene_BMK.20532;T1_Unigene_BMK.21991;T1_Unigene_BMK.22286;T1_Unigene_BMK.22288;T1_Unigene_BMK.23963;T1_Unigene_BMK.24723;T1_Unigene_BMK.24880;T1_Unigene_BMK.25971;T1_Unigene_BMK.26466;T1_Unigene_BMK.27362;T1_Unigene_BMK.27506;T1_Unigene_BMK.27674;T1_Unigene_BMK.29472;T1_Unigene_BMK.29530;T1_Unigene_BMK.30569;T1_Unigene_BMK.32744;…	K01904+K05928+K00457+K02552+K02552+K00815+K00815+K06125+K12501+K00591+K09833+K01904+K06127+K01904+K09834+K01904+K00815+K02552+K01904+K01904+K01904+K01904+K00815+K06127+K01661+K01904+K01904+K02548+K00457+K02552+K09833+K12501+K12501+K12501
Ether lipid metabolism	ko00565	34	T1_Unigene_BMK.13786;T1_Unigene_BMK.16252;T1_Unigene_BMK.16254;T1_Unigene_BMK.16255;T1_Unigene_BMK.18679;T1_Unigene_BMK.19145;T1_Unigene_BMK.23456;T1_Unigene_BMK.25768;T1_Unigene_BMK.26439;T1_Unigene_BMK.27588;T1_Unigene_BMK.28489;T1_Unigene_BMK.28966;T1_Unigene_BMK.31894;T1_Unigene_BMK.32879;T1_Unigene_BMK.33773;T1_Unigene_BMK.35111;T1_Unigene_BMK.6084;T1_Unigene_BMK.7056;T1_Unigene_BMK.7508;T1_…	K14674+K01114+K01114+K01114+K01115+K01115+K01114+K01115+K00993+K01114+K13510+K14674+K01115+K13510+K01115+K01114+K01115+K01115+K01114+K01115+K01115+K01114+K01115+K01114+K01114+K01115+K01115+K06123+K01115+K00993+K01114+K14674+K01115+K01115
Histidine metabolism	ko00340	33	T1_Unigene_BMK.10119;T1_Unigene_BMK.12069;T1_Unigene_BMK.12361;T1_Unigene_BMK.14167;T1_Unigene_BMK.14597;T1_Unigene_BMK.17432;T1_Unigene_BMK.25437;T1_Unigene_BMK.25588;T1_Unigene_BMK.26084;T1_Unigene_BMK.26368;T1_Unigene_BMK.27829;T1_Unigene_BMK.28058;T1_Unigene_BMK.28821;T1_Unigene_BMK.31254;T1_Unigene_BMK.32524;T1_Unigene_BMK.34549;T1_Unigene_BMK.35084;T1_Unigene_BMK.6727;T2_Unigene_BMK.11997;T…	K14085+K01814+K00765+K00765+K14085+K01693+K00013+K01814+K14085+K01693+K01590+K00128+K00817+K00765+K00128+K00128+K01590+K00128+K00128+K00128+K01693+K01693+K01663+K14085+K01590+K00128+K00599+K11755+K00128+K00128+K01814+K01590+K00128
Zeatin biosynthesis	ko00908	32	T1_Unigene_BMK.14496;T1_Unigene_BMK.20997;T1_Unigene_BMK.21646;T1_Unigene_BMK.22828;T1_Unigene_BMK.23033;T1_Unigene_BMK.23179;T1_Unigene_BMK.26543;T1_Unigene_BMK.26544;T1_Unigene_BMK.30642;T1_Unigene_BMK.35155;T1_Unigene_BMK.35474;T1_Unigene_BMK.3961;T1_Unigene_BMK.518;T1_Unigene_BMK.575;T1_Unigene_BMK.6021;T2_Unigene_BMK.20868;T2_Unigene_BMK.20869;T2_Unigene_BMK.23727;T2_Unigene_BMK.25737;T2_Uni…	K13496+K13493+K00279+K00279+K10717+K00791+K13493+K13493+K00279+K10760+K00279+K10760+K10760+K10760+K00279+K13496+K13496+K00791+K00279+K10760+K10760+K00279+K10760+K10760+K00279+K10760+K00279+K00279+K10717+K10717+K00279+K10760
One carbon pool by folate	ko00670	30	T1_Unigene_BMK.10252;T1_Unigene_BMK.11655;T1_Unigene_BMK.11656;T1_Unigene_BMK.11657;T1_Unigene_BMK.11658;T1_Unigene_BMK.1598;T1_Unigene_BMK.1599;T1_Unigene_BMK.23777;T1_Unigene_BMK.25675;T1_Unigene_BMK.27833;T1_Unigene_BMK.27877;T1_Unigene_BMK.28669;T1_Unigene_BMK.32512;T1_Unigene_BMK.33264;T1_Unigene_BMK.34882;T1_Unigene_BMK.36583;T1_Unigene_BMK.532;T2_Unigene_BMK.1570;T2_Unigene_BMK.17457;T2_Un…	K00600+K00602+K00602+K00602+K00602+K00600+K00600+K00602+K13998+K00297+K00600+K00600+K00605+K00600+K00297+K00297+K00288+K01934+K01934+K00601+K01934+K00600+K00604+K00600+K00600+K00605+K01433+K00600+K00600+K00600
Lysine biosynthesis	ko00300	28	T1_Unigene_BMK.10119;T1_Unigene_BMK.14597;T1_Unigene_BMK.17961;T1_Unigene_BMK.19351;T1_Unigene_BMK.26084;T1_Unigene_BMK.26749;T1_Unigene_BMK.28250;T1_Unigene_BMK.29464;T1_Unigene_BMK.30427;T1_Unigene_BMK.30557;T1_Unigene_BMK.31235;T1_Unigene_BMK.31236;T1_Unigene_BMK.31827;T1_Unigene_BMK.32890;T1_Unigene_BMK.7269;T2_Unigene_BMK.12864;T2_Unigene_BMK.12865;T2_Unigene_BMK.17793;T2_Unigene_BMK.20381;T…	K14085+K14085+K00928+K10206+K14085+K00928+K00215+K00145+K12524+K14157+K01586+K01586+K00133+K00928+K01778+K10206+K10206+K01778+K00215+K00215+K01778+K14085+K00145+K00215+K01586+K01714+K00133+K00145
Glucosinolate biosynthesis	ko00966	28	T1_Unigene_BMK.15861;T1_Unigene_BMK.15862;T1_Unigene_BMK.21537;T1_Unigene_BMK.22206;T1_Unigene_BMK.26974;T1_Unigene_BMK.27370;T1_Unigene_BMK.28099;T1_Unigene_BMK.28366;T1_Unigene_BMK.31507;T1_Unigene_BMK.31600;T1_Unigene_BMK.31601;T1_Unigene_BMK.33208;T1_Unigene_BMK.33946;T1_Unigene_BMK.8165;T1_Unigene_BMK.9671;T2_Unigene_BMK.10111;T2_Unigene_BMK.14826;T2_Unigene_BMK.16553;T2_Unigene_BMK.19027;T2…	K11820+K11820+K00826+K11820+K00826+K12154+K00826+K11821+K11813+K01649+K01649+K00826+K11818+K00826+K00826+K12153+K00826+K12156+K11821+K11821+K00826+K01649+K00826+K00826+K11819+K11813+K01649+K01649
Photosynthesis - antenna proteins	ko00196	26	T1_Unigene_BMK.10693;T1_Unigene_BMK.13832;T1_Unigene_BMK.16684;T1_Unigene_BMK.19245;T1_Unigene_BMK.19512;T1_Unigene_BMK.19562;T1_Unigene_BMK.20179;T1_Unigene_BMK.21557;T1_Unigene_BMK.21572;T1_Unigene_BMK.23376;T1_Unigene_BMK.23595;T1_Unigene_BMK.25970;T1_Unigene_BMK.26665;T1_Unigene_BMK.28132;T1_Unigene_BMK.30886;T1_Unigene_BMK.34348;T1_Unigene_BMK.35387;T1_Unigene_BMK.5787;T1_Unigene_BMK.5811;T1…	K08912+K08917+K08917+K08915+K08915+K08908+K08911+K08914+K08915+K14172+K08909+K08908+K08916+K08907+K08915+K08913+K08913+K08913+K08913+K08909+K08914+K08913+K08913+K08913+K08915+K08913
Lysine degradation	ko00310	26	T1_Unigene_BMK.10119;T1_Unigene_BMK.11652;T1_Unigene_BMK.14597;T1_Unigene_BMK.17619;T1_Unigene_BMK.26084;T1_Unigene_BMK.26876;T1_Unigene_BMK.28058;T1_Unigene_BMK.30557;T1_Unigene_BMK.31242;T1_Unigene_BMK.31770;T1_Unigene_BMK.31794;T1_Unigene_BMK.32524;T1_Unigene_BMK.34549;T1_Unigene_BMK.6599;T1_Unigene_BMK.6727;T1_Unigene_BMK.709;T2_Unigene_BMK.11997;T2_Unigene_BMK.12046;T2_Unigene_BMK.12900;T2_U…	K14085+K00626+K14085+K01692+K14085+K00658+K00128+K14157+K00626+K00164+K00658+K00128+K00128+K07511+K00128+K00252+K00128+K00128+K00658+K14085+K00128+K00164+K00128+K00128+K00128+K00658
Flavonoid biosynthesis	ko00941	25	T1_Unigene_BMK.1235;T1_Unigene_BMK.13487;T1_Unigene_BMK.15540;T1_Unigene_BMK.16789;T1_Unigene_BMK.17986;T1_Unigene_BMK.18931;T1_Unigene_BMK.20409;T1_Unigene_BMK.23910;T1_Unigene_BMK.25737;T1_Unigene_BMK.26605;T1_Unigene_BMK.31460;T1_Unigene_BMK.31529;T1_Unigene_BMK.32197;T1_Unigene_BMK.33411;T1_Unigene_BMK.35158;T1_Unigene_BMK.4922;T1_Unigene_BMK.810;T2_Unigene_BMK.14541;T2_Unigene_BMK.14542;T2_U…	K08695+K05277+K05277+K05278+K01859+K13082+K05278+K05277+K05280+K00588+K00660+K00475+K09754+K00487+K13082+K00487+K05278+K00660+K00660+K00588+K13065+K00588+K00091+K09754+K05277
Diterpenoid biosynthesis	ko00904	24	T1_Unigene_BMK.10126;T1_Unigene_BMK.14233;T1_Unigene_BMK.14538;T1_Unigene_BMK.22983;T1_Unigene_BMK.23381;T1_Unigene_BMK.23382;T1_Unigene_BMK.23734;T1_Unigene_BMK.24176;T1_Unigene_BMK.27342;T1_Unigene_BMK.29518;T1_Unigene_BMK.30100;T1_Unigene_BMK.34519;T1_Unigene_BMK.548;T1_Unigene_BMK.549;T1_Unigene_BMK.6476;T2_Unigene_BMK.11252;T2_Unigene_BMK.11741;T2_Unigene_BMK.2799;T2_Unigene_BMK.28768;T2_Uni…	K05282+K04123+K05282+K04125+K04120+K04120+K04121+K05282+K04125+K04122+K04123+K05282+K04124+K04124+K05282+K04124+K05282+K04125+K05282+K04124+K04120+K04120+K05282+K04125
Arachidonic acid metabolism	ko00590	21	T1_Unigene_BMK.13786;T1_Unigene_BMK.19104;T1_Unigene_BMK.19105;T1_Unigene_BMK.19403;T1_Unigene_BMK.22089;T1_Unigene_BMK.2695;T1_Unigene_BMK.2744;T1_Unigene_BMK.28635;T1_Unigene_BMK.28966;T1_Unigene_BMK.29276;T1_Unigene_BMK.29412;T2_Unigene_BMK.11480;T2_Unigene_BMK.13717;T2_Unigene_BMK.13749;T2_Unigene_BMK.13750;T2_Unigene_BMK.14599;T2_Unigene_BMK.14600;T2_Unigene_BMK.16566;T2_Unigene_BMK.25587;T2…	K14674+K00681+K00681+K00432+K00432+K01254+K00432+K00432+K14674+K00681+K00681+K00432+K00432+K00681+K00681+K00681+K00681+K00432+K00432+K14674+K01254
Folate biosynthesis	ko00790	21	T1_Unigene_BMK.11363;T1_Unigene_BMK.1377;T1_Unigene_BMK.14578;T1_Unigene_BMK.15871;T1_Unigene_BMK.19637;T1_Unigene_BMK.25675;T1_Unigene_BMK.30062;T1_Unigene_BMK.30873;T1_Unigene_BMK.31537;T1_Unigene_BMK.32733;T1_Unigene_BMK.33420;T1_Unigene_BMK.36328;T1_Unigene_BMK.5251;T1_Unigene_BMK.6757;T1_Unigene_BMK.6758;T2_Unigene_BMK.169;T2_Unigene_BMK.17546;T2_Unigene_BMK.20215;T2_Unigene_BMK.27064;T2_Uni…	K01077+K13941+K01113+K01633+K01307+K13998+K01930+K01930+K13950+K01495+K13941+K01737+K01307+K01077+K01077+K01930+K01633+K01307+K01930+K01930+K01930
Tropane, piperidine and pyridine alkaloid biosynthesis	ko00960	21	T1_Unigene_BMK.12495;T1_Unigene_BMK.12831;T1_Unigene_BMK.16089;T1_Unigene_BMK.16483;T1_Unigene_BMK.18173;T1_Unigene_BMK.22286;T1_Unigene_BMK.22288;T1_Unigene_BMK.22397;T1_Unigene_BMK.26695;T1_Unigene_BMK.27945;T1_Unigene_BMK.28349;T1_Unigene_BMK.28821;T1_Unigene_BMK.29530;T2_Unigene_BMK.11063;T2_Unigene_BMK.14325;T2_Unigene_BMK.14543;T2_Unigene_BMK.16221;T2_Unigene_BMK.17393;T2_Unigene_BMK.18622;…	K00276+K08081+K08081+K08081+K08081+K00815+K00815+K08081+K08081+K00276+K00813+K00817+K00815+K00813+K00815+K08081+K08081+K00813+K08081+K08081+K00276
Natural killer cell mediated cytotoxicity	ko04650	21	T1_Unigene_BMK.15433;T1_Unigene_BMK.15597;T1_Unigene_BMK.17462;T1_Unigene_BMK.18710;T1_Unigene_BMK.18805;T1_Unigene_BMK.21674;T1_Unigene_BMK.21675;T1_Unigene_BMK.22621;T1_Unigene_BMK.24173;T1_Unigene_BMK.25088;T1_Unigene_BMK.25324;T1_Unigene_BMK.27235;T1_Unigene_BMK.5779;T1_Unigene_BMK.71;T2_Unigene_BMK.11645;T2_Unigene_BMK.17038;T2_Unigene_BMK.22292;T2_Unigene_BMK.26045;T2_Unigene_BMK.26232;T2_U…	K06268+K06268+K04371+K04371+K04371+K04371+K04371+K04371+K04368+K04371+K06268+K04371+K04371+K04371+K04371+K04371+K04371+K04371+K04368+K04371+K06268
Taurine and hypotaurine metabolism	ko00430	20	T1_Unigene_BMK.18473;T1_Unigene_BMK.19046;T1_Unigene_BMK.19104;T1_Unigene_BMK.19105;T1_Unigene_BMK.22714;T1_Unigene_BMK.27724;T1_Unigene_BMK.29276;T1_Unigene_BMK.29412;T2_Unigene_BMK.13749;T2_Unigene_BMK.13750;T2_Unigene_BMK.14293;T2_Unigene_BMK.14599;T2_Unigene_BMK.14600;T2_Unigene_BMK.17722;T2_Unigene_BMK.19156;T2_Unigene_BMK.22187;T2_Unigene_BMK.25025;T2_Unigene_BMK.25559;T2_Unigene_BMK.32345;…	K10712+K01580+K00681+K00681+K10712+K10712+K00681+K00681+K00681+K00681+K01580+K00681+K00681+K01580+K10712+K01580+K01580+K10712+K01580+K01580
Linoleic acid metabolism	ko00591	19	T1_Unigene_BMK.11098;T1_Unigene_BMK.11945;T1_Unigene_BMK.13786;T1_Unigene_BMK.13866;T1_Unigene_BMK.1489;T1_Unigene_BMK.2339;T1_Unigene_BMK.28966;T1_Unigene_BMK.29253;T1_Unigene_BMK.30025;T1_Unigene_BMK.32098;T1_Unigene_BMK.4873;T2_Unigene_BMK.12363;T2_Unigene_BMK.12364;T2_Unigene_BMK.1373;T2_Unigene_BMK.1771;T2_Unigene_BMK.27980;T2_Unigene_BMK.2812;T2_Unigene_BMK.29178;T2_Unigene_BMK.3226;	K00454+K00454+K14674+K00454+K00454+K00454+K14674+K00454+K00454+K00454+K00454+K00454+K00454+K00454+K00454+K14674+K00454+K00454+K00454
Lysosome	ko04142	19	T1_Unigene_BMK.1256;T1_Unigene_BMK.12816;T1_Unigene_BMK.13488;T1_Unigene_BMK.13905;T1_Unigene_BMK.15583;T1_Unigene_BMK.1915;T1_Unigene_BMK.2234;T1_Unigene_BMK.27527;T1_Unigene_BMK.28614;T1_Unigene_BMK.3131;T1_Unigene_BMK.3190;T1_Unigene_BMK.35507;T1_Unigene_BMK.5010;T1_Unigene_BMK.5578;T1_Unigene_BMK.6941;T1_Unigene_BMK.9618;T1_Unigene_BMK.9620;T2_Unigene_BMK.18247;T2_Unigene_BMK.6592;	K01379+K01365+K01363+K01365+K01379+K06497+K01363+K01365+K04646+K02144+K02154+K12387+K06497+K01365+K01363+K02155+K02155+K01363+K01365
Glycosphingolipid biosynthesis - globo series	ko00603	14	T1_Unigene_BMK.11755;T1_Unigene_BMK.20968;T1_Unigene_BMK.22929;T1_Unigene_BMK.22930;T1_Unigene_BMK.23898;T1_Unigene_BMK.25478;T1_Unigene_BMK.731;T2_Unigene_BMK.16390;T2_Unigene_BMK.18496;T2_Unigene_BMK.22543;T2_Unigene_BMK.22770;T2_Unigene_BMK.22851;T2_Unigene_BMK.9996;T2_Unigene_BMK.9997;	K01988+K12373+K12373+K12373+K12373+K01988+K01988+K01988+K07407+K12373+K07407+K07407+K01988+K01988
Vitamin B6 metabolism	ko00750	14	T1_Unigene_BMK.23158;T1_Unigene_BMK.23575;T1_Unigene_BMK.23576;T1_Unigene_BMK.24759;T1_Unigene_BMK.24760;T1_Unigene_BMK.30282;T1_Unigene_BMK.5741;T1_Unigene_BMK.7813;T1_Unigene_BMK.9815;T2_Unigene_BMK.16175;T2_Unigene_BMK.20176;T2_Unigene_BMK.21039;T2_Unigene_BMK.4735;T2_Unigene_BMK.800;	K00868+K01733+K01733+K01733+K01733+K01733+K06215+K00831+K01733+K00831+K06215+K08681+K00831+K00831
Nicotinate and nicotinamide metabolism	ko00760	14	T1_Unigene_BMK.12441;T1_Unigene_BMK.18167;T1_Unigene_BMK.24920;T1_Unigene_BMK.30077;T1_Unigene_BMK.30127;T1_Unigene_BMK.30936;T1_Unigene_BMK.32515;T1_Unigene_BMK.5077;T1_Unigene_BMK.5560;T2_Unigene_BMK.20800;T2_Unigene_BMK.22427;T2_Unigene_BMK.22840;T2_Unigene_BMK.25915;T2_Unigene_BMK.30483;	K00858+K03787+K00858+K01950+K00767+K00278+K00763+K03783+K00858+K06210+K03426+K03787+K00763+K03517
Regulation of autophagy	ko04140	14	T1_Unigene_BMK.10819;T1_Unigene_BMK.18211;T1_Unigene_BMK.22376;T1_Unigene_BMK.23511;T1_Unigene_BMK.25181;T1_Unigene_BMK.29470;T1_Unigene_BMK.30387;T1_Unigene_BMK.30531;T1_Unigene_BMK.33054;T1_Unigene_BMK.33160;T2_Unigene_BMK.14513;T2_Unigene_BMK.14892;T2_Unigene_BMK.30016;T2_Unigene_BMK.30684;	K08341+K08341+K08336+K08339+K08334+K08337+K08343+K00914+K08269+K08333+K08342+K08342+K08269+K08333
Circadian rhythm - mammal	ko04710	14	T1_Unigene_BMK.10888;T1_Unigene_BMK.11890;T1_Unigene_BMK.206;T1_Unigene_BMK.21865;T1_Unigene_BMK.23529;T1_Unigene_BMK.29420;T1_Unigene_BMK.34604;T1_Unigene_BMK.36309;T1_Unigene_BMK.9173;T1_Unigene_BMK.9481;T2_Unigene_BMK.1287;T2_Unigene_BMK.16538;T2_Unigene_BMK.22703;T2_Unigene_BMK.2433;	K03094+K03094+K03094+K08960+K03868+K02295+K03347+K03347+K03094+K03094+K03094+K03868+K08960+K03094
Other glycan degradation	ko00511	13	T1_Unigene_BMK.15660;T1_Unigene_BMK.20968;T1_Unigene_BMK.22929;T1_Unigene_BMK.22930;T1_Unigene_BMK.23047;T1_Unigene_BMK.23898;T1_Unigene_BMK.30654;T1_Unigene_BMK.30670;T1_Unigene_BMK.32336;T2_Unigene_BMK.19197;T2_Unigene_BMK.22543;T2_Unigene_BMK.32093;T2_Unigene_BMK.7353;	K12311+K12373+K12373+K12373+K01444+K12373+K12309+K01227+K01191+K01190+K12373+K01190+K01227
Glycosylphosphatidylinositol(GPI)-anchor biosynthesis	ko00563	13	T1_Unigene_BMK.18258;T1_Unigene_BMK.19666;T1_Unigene_BMK.24972;T1_Unigene_BMK.26427;T1_Unigene_BMK.29192;T1_Unigene_BMK.29753;T1_Unigene_BMK.29818;T1_Unigene_BMK.33798;T1_Unigene_BMK.4093;T2_Unigene_BMK.11271;T2_Unigene_BMK.20836;T2_Unigene_BMK.9730;T2_Unigene_BMK.9731;	K05284+K03859+K03857+K05284+K05289+K05292+K07542+K05310+K05286+K07541+K05286+K05286+K05286
Sphingolipid metabolism	ko00600	13	T1_Unigene_BMK.24486;T1_Unigene_BMK.24487;T1_Unigene_BMK.29795;T1_Unigene_BMK.29870;T1_Unigene_BMK.30654;T1_Unigene_BMK.31082;T1_Unigene_BMK.7375;T2_Unigene_BMK.18496;T2_Unigene_BMK.19197;T2_Unigene_BMK.22770;T2_Unigene_BMK.22851;T2_Unigene_BMK.27414;T2_Unigene_BMK.32093;	K04711+K04711+K00654+K04708+K12309+K01634+K00654+K07407+K01190+K07407+K07407+K00654+K01190
C5-Branched dibasic acid metabolism	ko00660	13	T1_Unigene_BMK.11907;T1_Unigene_BMK.18036;T1_Unigene_BMK.2096;T1_Unigene_BMK.21290;T1_Unigene_BMK.21350;T1_Unigene_BMK.22271;T2_Unigene_BMK.15675;T2_Unigene_BMK.18890;T2_Unigene_BMK.21737;T2_Unigene_BMK.31804;T2_Unigene_BMK.32768;T2_Unigene_BMK.3406;T2_Unigene_BMK.3653;	K01704+K01652+K01703+K01704+K01703+K01652+K01652+K01704+K01704+K01653+K01652+K01653+K01652
Sulfur relay system	ko04122	13	T1_Unigene_BMK.18259;T1_Unigene_BMK.25328;T1_Unigene_BMK.28445;T1_Unigene_BMK.29982;T1_Unigene_BMK.30659;T1_Unigene_BMK.31021;T2_Unigene_BMK.14262;T2_Unigene_BMK.22688;T2_Unigene_BMK.23731;T2_Unigene_BMK.27035;T2_Unigene_BMK.27063;T2_Unigene_BMK.27880;T2_Unigene_BMK.31407;	K12161+K03639+K01011+K14169+K03639+K01011+K03635+K12161+K14168+K00566+K11996+K04487+K03639
Isoquinoline alkaloid biosynthesis	ko00950	12	T1_Unigene_BMK.12495;T1_Unigene_BMK.22286;T1_Unigene_BMK.22288;T1_Unigene_BMK.24155;T1_Unigene_BMK.27945;T1_Unigene_BMK.28349;T1_Unigene_BMK.29530;T2_Unigene_BMK.11063;T2_Unigene_BMK.14325;T2_Unigene_BMK.15280;T2_Unigene_BMK.17393;T2_Unigene_BMK.9064;	K00276+K00815+K00815+K01592+K00276+K00813+K00815+K00813+K00815+K01592+K00813+K00276
Riboflavin metabolism	ko00740	11	T1_Unigene_BMK.17597;T1_Unigene_BMK.22318;T1_Unigene_BMK.26362;T1_Unigene_BMK.27023;T1_Unigene_BMK.29502;T1_Unigene_BMK.31063;T2_Unigene_BMK.12105;T2_Unigene_BMK.1628;T2_Unigene_BMK.24650;T2_Unigene_BMK.25510;T2_Unigene_BMK.27921;	K00793+K01078+K00794+K11752+K14652+K14652+K11752+K00861+K14652+K00861+K14652
Brassinosteroid biosynthesis	ko00905	11	T1_Unigene_BMK.12109;T1_Unigene_BMK.12110;T1_Unigene_BMK.12111;T1_Unigene_BMK.2634;T1_Unigene_BMK.26884;T1_Unigene_BMK.27238;T1_Unigene_BMK.31372;T2_Unigene_BMK.23861;T2_Unigene_BMK.24182;T2_Unigene_BMK.24183;T2_Unigene_BMK.29882;	K12640+K12640+K09590+K09590+K12638+K12637+K09587+K12638+K12640+K09590+K09588
Non-homologous end-joining	ko03450	11	T1_Unigene_BMK.14630;T1_Unigene_BMK.15921;T1_Unigene_BMK.21346;T1_Unigene_BMK.21347;T1_Unigene_BMK.24114;T1_Unigene_BMK.26492;T1_Unigene_BMK.28957;T1_Unigene_BMK.28959;T1_Unigene_BMK.29575;T1_Unigene_BMK.32555;T2_Unigene_BMK.28784;	K10886+K03512+K10865+K10865+K10885+K10777+K10886+K10886+K10884+K10866+K04799
ABC transporters	ko02010	10	T1_Unigene_BMK.20528;T1_Unigene_BMK.20529;T1_Unigene_BMK.32853;T2_Unigene_BMK.10073;T2_Unigene_BMK.10940;T2_Unigene_BMK.2227;T2_Unigene_BMK.28698;T2_Unigene_BMK.2891;T2_Unigene_BMK.31049;T2_Unigene_BMK.4864;	K05663+K05663+K05663+K05658+K05663+K05658+K05658+K05658+K05658+K05658
Metabolism of xenobiotics by cytochrome P450	ko00980	9	T1_Unigene_BMK.1135;T1_Unigene_BMK.11528;T1_Unigene_BMK.2031;T1_Unigene_BMK.2048;T1_Unigene_BMK.2530;T1_Unigene_BMK.2531;T1_Unigene_BMK.3715;T1_Unigene_BMK.4058;T2_Unigene_BMK.6709;	K00799+K13951+K00799+K00799+K00078+K00078+K00699+K00121+K13953
Wnt signaling pathway	ko04310	9	T1_Unigene_BMK.11507;T1_Unigene_BMK.3070;T1_Unigene_BMK.3296;T1_Unigene_BMK.36309;T1_Unigene_BMK.6224;T1_Unigene_BMK.6496;T1_Unigene_BMK.7190;T1_Unigene_BMK.9173;T2_Unigene_BMK.32875;	K04496+K04496+K03097+K03347+K08957+K03094+K03115+K03094+K04513
Glycosaminoglycan degradation	ko00531	7	T1_Unigene_BMK.20968;T1_Unigene_BMK.22929;T1_Unigene_BMK.22930;T1_Unigene_BMK.23898;T1_Unigene_BMK.30075;T1_Unigene_BMK.30654;T2_Unigene_BMK.22543;	K12373+K12373+K12373+K12373+K10532+K12309+K12373
Lipoic acid metabolism	ko00785	7	T1_Unigene_BMK.2143;T1_Unigene_BMK.27484;T1_Unigene_BMK.28587;T1_Unigene_BMK.28588;T2_Unigene_BMK.19498;T2_Unigene_BMK.27470;T2_Unigene_BMK.8848;	K03801+K03644+K03801+K03801+K03644+K03801+K03644
Drug metabolism - cytochrome P450	ko00982	7	T1_Unigene_BMK.1135;T1_Unigene_BMK.11528;T1_Unigene_BMK.2031;T1_Unigene_BMK.2048;T1_Unigene_BMK.3715;T1_Unigene_BMK.4058;T2_Unigene_BMK.6709;	K00799+K13951+K00799+K00799+K00699+K00121+K13953
Glycosphingolipid biosynthesis - ganglio series	ko00604	6	T1_Unigene_BMK.20968;T1_Unigene_BMK.22929;T1_Unigene_BMK.22930;T1_Unigene_BMK.23898;T1_Unigene_BMK.30654;T2_Unigene_BMK.22543;	K12373+K12373+K12373+K12373+K12309+K12373
Thiamine metabolism	ko00730	6	T1_Unigene_BMK.26372;T1_Unigene_BMK.26975;T1_Unigene_BMK.30237;T2_Unigene_BMK.2579;T2_Unigene_BMK.27880;T2_Unigene_BMK.5218;	K14153+K00949+K11717+K11717+K04487+K03147
Indole alkaloid biosynthesis	ko00901	6	T1_Unigene_BMK.10789;T1_Unigene_BMK.12905;T1_Unigene_BMK.16032;T1_Unigene_BMK.21144;T1_Unigene_BMK.25633;T2_Unigene_BMK.4663;	K08233+K01757+K08233+K01757+K01757+K08233
Flavone and flavonol biosynthesis	ko00944	6	T1_Unigene_BMK.14363;T1_Unigene_BMK.23749;T1_Unigene_BMK.25737;T1_Unigene_BMK.34506;T2_Unigene_BMK.22772;T2_Unigene_BMK.24896;	K10757+K05279+K05280+K05279+K05279+K10757
Fatty acid elongation in mitochondria	ko00062	5	T1_Unigene_BMK.20256;T1_Unigene_BMK.3367;T1_Unigene_BMK.35559;T1_Unigene_BMK.6599;T2_Unigene_BMK.13387;	K01074+K07508+K01074+K07511+K07512
Other types of O-glycan biosynthesis	ko00514	5	T1_Unigene_BMK.1741;T1_Unigene_BMK.27110;T1_Unigene_BMK.3715;T1_Unigene_BMK.4247;T2_Unigene_BMK.31456;	K09667+K03691+K00699+K03691+K09667
Calcium signaling pathway	ko04020	5	T1_Unigene_BMK.12862;T2_Unigene_BMK.11603;T2_Unigene_BMK.11605;T2_Unigene_BMK.24389;T2_Unigene_BMK.5883;	K05862+K05862+K05862+K05853+K02183
TGF-beta signaling pathway	ko04350	5	T1_Unigene_BMK.25775;T1_Unigene_BMK.36309;T1_Unigene_BMK.6496;T1_Unigene_BMK.9173;T2_Unigene_BMK.32875;	K04680+K03347+K03094+K03094+K04513
Synthesis and degradation of ketone bodies	ko00072	4	T1_Unigene_BMK.11652;T1_Unigene_BMK.31242;T2_Unigene_BMK.21227;T2_Unigene_BMK.29625;	K00626+K00626+K01640+K01641
Biotin metabolism	ko00780	4	T1_Unigene_BMK.17613;T1_Unigene_BMK.23480;T1_Unigene_BMK.24044;T1_Unigene_BMK.30685;	K01012+K00652+K01012+K00833
Retinol metabolism	ko00830	4	T1_Unigene_BMK.11528;T1_Unigene_BMK.3715;T1_Unigene_BMK.4058;T2_Unigene_BMK.6709;	K13951+K00699+K00121+K13953
Drug metabolism - other enzymes	ko00983	4	T1_Unigene_BMK.1811;T1_Unigene_BMK.35602;T1_Unigene_BMK.3715;T2_Unigene_BMK.2058;	K00207+K00207+K00699+K01464
Dorso-ventral axis formation	ko04320	4	T1_Unigene_BMK.13673;T1_Unigene_BMK.35594;T1_Unigene_BMK.621;T1_Unigene_BMK.8004;	K03102+K02156+K02156+K03102
Caffeine metabolism	ko00232	3	T1_Unigene_BMK.24250;T1_Unigene_BMK.33534;T2_Unigene_BMK.21785;	K00365+K00106+K00365
Methane metabolism	ko00680	3	T1_Unigene_BMK.6673;T1_Unigene_BMK.6674;T2_Unigene_BMK.29322;	K01834+K01834+K01834
Insect hormone biosynthesis	ko00981	3	T1_Unigene_BMK.3909;T1_Unigene_BMK.9842;T1_Unigene_BMK.9843;	K10719+K10719+K10719
Neuroactive ligand-receptor interaction	ko04080	3	T1_Unigene_BMK.1467;T1_Unigene_BMK.34174;T1_Unigene_BMK.34956;	K05770+K05236+K04237
mTOR signaling pathway	ko04150	3	T1_Unigene_BMK.3521;T1_Unigene_BMK.5555;T2_Unigene_BMK.1760;	K02991+K02991+K02991
Cardiac muscle contraction	ko04260	3	T1_Unigene_BMK.19142;T1_Unigene_BMK.35452;T2_Unigene_BMK.12387;	K00412+K02261+K00412
Notch signaling pathway	ko04330	3	T1_Unigene_BMK.1146;T1_Unigene_BMK.11507;T1_Unigene_BMK.3070;	K06067+K04496+K04496
Phototransduction - fly	ko04745	3	T1_Unigene_BMK.29003;T1_Unigene_BMK.4650;T2_Unigene_BMK.16822;	K05692+K02183+K05692
Regulation of actin cytoskeleton	ko04810	3	T1_Unigene_BMK.36205;T1_Unigene_BMK.6865;T2_Unigene_BMK.31072;	K06269+K05692+K05748
Progesterone-mediated oocyte maturation	ko04914	3	T1_Unigene_BMK.1505;T1_Unigene_BMK.6895;T1_Unigene_BMK.7671;	K04079+K04079+K04079
Systemic lupus erythematosus	ko05322	3	T1_Unigene_BMK.1090;T1_Unigene_BMK.4245;T2_Unigene_BMK.11302;	K11089+K11089+K11089
D-Glutamine and D-glutamate metabolism	ko00471	2	T1_Unigene_BMK.34133;T1_Unigene_BMK.9053;	K00261+K00261
Monoterpenoid biosynthesis	ko00902	2	T1_Unigene_BMK.1990;T1_Unigene_BMK.21689;	K12467+K07385
Sesquiterpenoid biosynthesis	ko00909	2	T2_Unigene_BMK.1294;T2_Unigene_BMK.309;	K14184+K14184
Oocyte meiosis	ko04114	2	T1_Unigene_BMK.12369;T1_Unigene_BMK.36205;	K06630+K06269
Focal adhesion	ko04510	2	T1_Unigene_BMK.36205;T1_Unigene_BMK.6865;	K06269+K05692
Adherens junction	ko04520	2	T1_Unigene_BMK.6865;T2_Unigene_BMK.31072;	K05692+K05748
Insulin signaling pathway	ko04910	2	T1_Unigene_BMK.36205;T2_Unigene_BMK.32769;	K06269+K04372
Hypertrophic cardiomyopathy (HCM)	ko05410	2	T1_Unigene_BMK.6865;T2_Unigene_BMK.26794;	K05692+K12567
Dilated cardiomyopathy	ko05414	2	T1_Unigene_BMK.6865;T2_Unigene_BMK.26794;	K05692+K12567
Anthocyanin biosynthesis	ko00942	1	T1_Unigene_BMK.5936;	K12338
Two-component system	ko02020	1	T1_Unigene_BMK.8697;	K03406
Bacterial chemotaxis	ko02030	1	T1_Unigene_BMK.8697;	K03406
PPAR signaling pathway	ko03320	1	T1_Unigene_BMK.420;	K08745
MAPK signaling pathway	ko04010	1	T2_Unigene_BMK.32769;	K04372
MAPK signaling pathway - yeast	ko04011	1	T2_Unigene_BMK.11883;	K11245
Cell cycle	ko04110	1	T1_Unigene_BMK.12369;	K06630
p53 signaling pathway	ko04115	1	T1_Unigene_BMK.22708;	K10135
Vascular smooth muscle contraction	ko04270	1	T1_Unigene_BMK.36205;	K06269
Hedgehog signaling pathway	ko04340	1	T1_Unigene_BMK.6224;	K08957
ECM-receptor interaction	ko04512	1	T2_Unigene_BMK.33080;	K06237
Tight junction	ko04530	1	T1_Unigene_BMK.6865;	K05692
Antigen processing and presentation	ko04612	1	T2_Unigene_BMK.16477;	K09490
Leukocyte transendothelial migration	ko04670	1	T1_Unigene_BMK.6865;	K05692
Proximal tubule bicarbonate reclamation	ko04964	1	T1_Unigene_BMK.35798;	K00025
Pancreatic secretion	ko04972	1	T2_Unigene_BMK.24389;	K05853
Alzheimer's disease	ko05010	1	T2_Unigene_BMK.24389;	K05853
Parkinson's disease	ko05012	1	T1_Unigene_BMK.9785;	K05688
Prion diseases	ko05020	1	T2_Unigene_BMK.16477;	K09490
Bacterial invasion of epithelial cells	ko05100	1	T1_Unigene_BMK.6865;	K05692
Amoebiasis	ko05146	1	T1_Unigene_BMK.11020;	K13977
Arrhythmogenic right ventricular cardiomyopathy (ARVC)	ko05412	1	T1_Unigene_BMK.6865;	K05692
Viral myocarditis	ko05416	1	T1_Unigene_BMK.6865;	K05692
